# Supplementary material for: Two interacting ethylene response factors negatively regulate peach resistance to Lasiodiplodia theobromae
Source: PubMed Central journal article supplement — Plant Physiol. 2023 May 11;192(4):3134–51. doi: 10.1093/plphys/kiad279 (PMC10400035; doi:10.1093/plphys/kiad279), 2023-05-11
Supplement: kiad279_supplementary_data.pdf [file kiad279_supplementary_data.pdf]

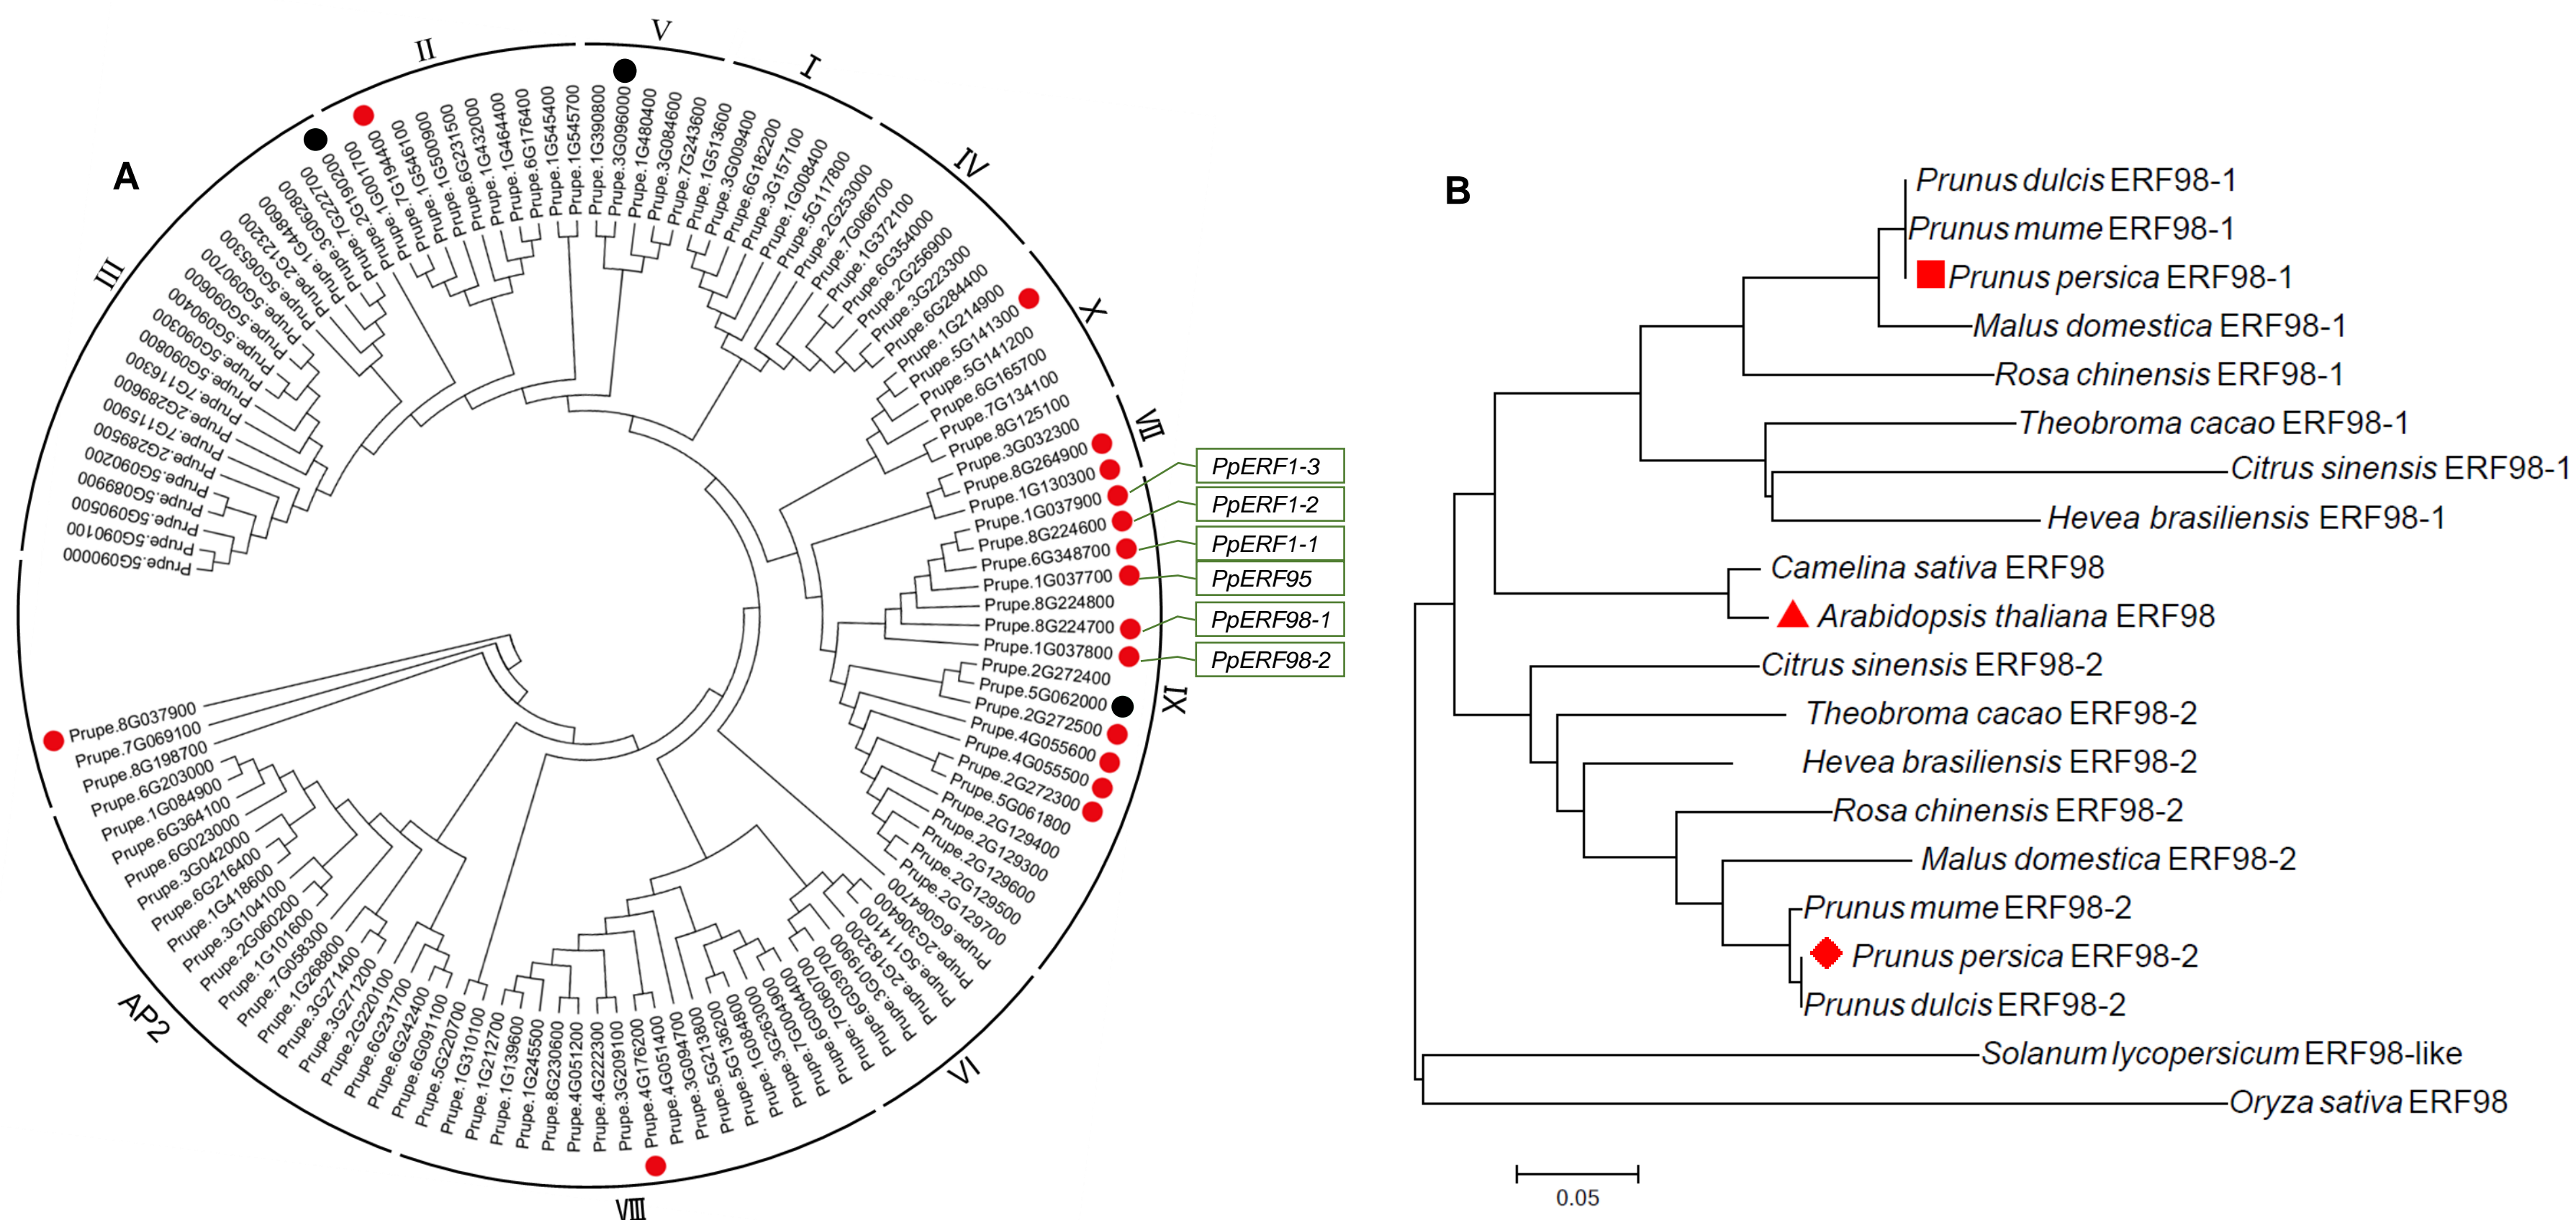

**Supplemental Figure S1. Characterization of *PpERF98-1* and *2* genes in *Prunus persica*.** (A) Differentially expressed *PpERFs* in *Lasiodiplodia theobromae*-induced peach gummosis. Red and black dots represent upregulated and down-regulated *PpERF* genes, respectively. (B) Phylogenetic analysis of *PpERF98-1* and *2* with their orthologs from *Arabidopsis thaliana*, *Camelina sativa*, *Citrus sinensis*, *Oryza sativa*, *Hevea brasiliensis*, *Malus domestica*, *P. dulcis*, *P. mume*, *P. persica*, *Rosa chinensis*, *Solanum lycopersicum*, and *Theobroma cacao*. All protein sequences were retrieved from the GenBank of NCBI. The predicted protein sequences were clustered using ClustalX and MEGA7. Phylogenetic relationships were calculated with maximum-likelihood principle, and bootstrap values within 1000 replicates were determined. Scale bar gives the number of substitutions per cite. Peach ERF98-1 and 2 are noted with red square and rhombus, respectively, and *Arabidopsis* ERF98 is marked with a red triangle.

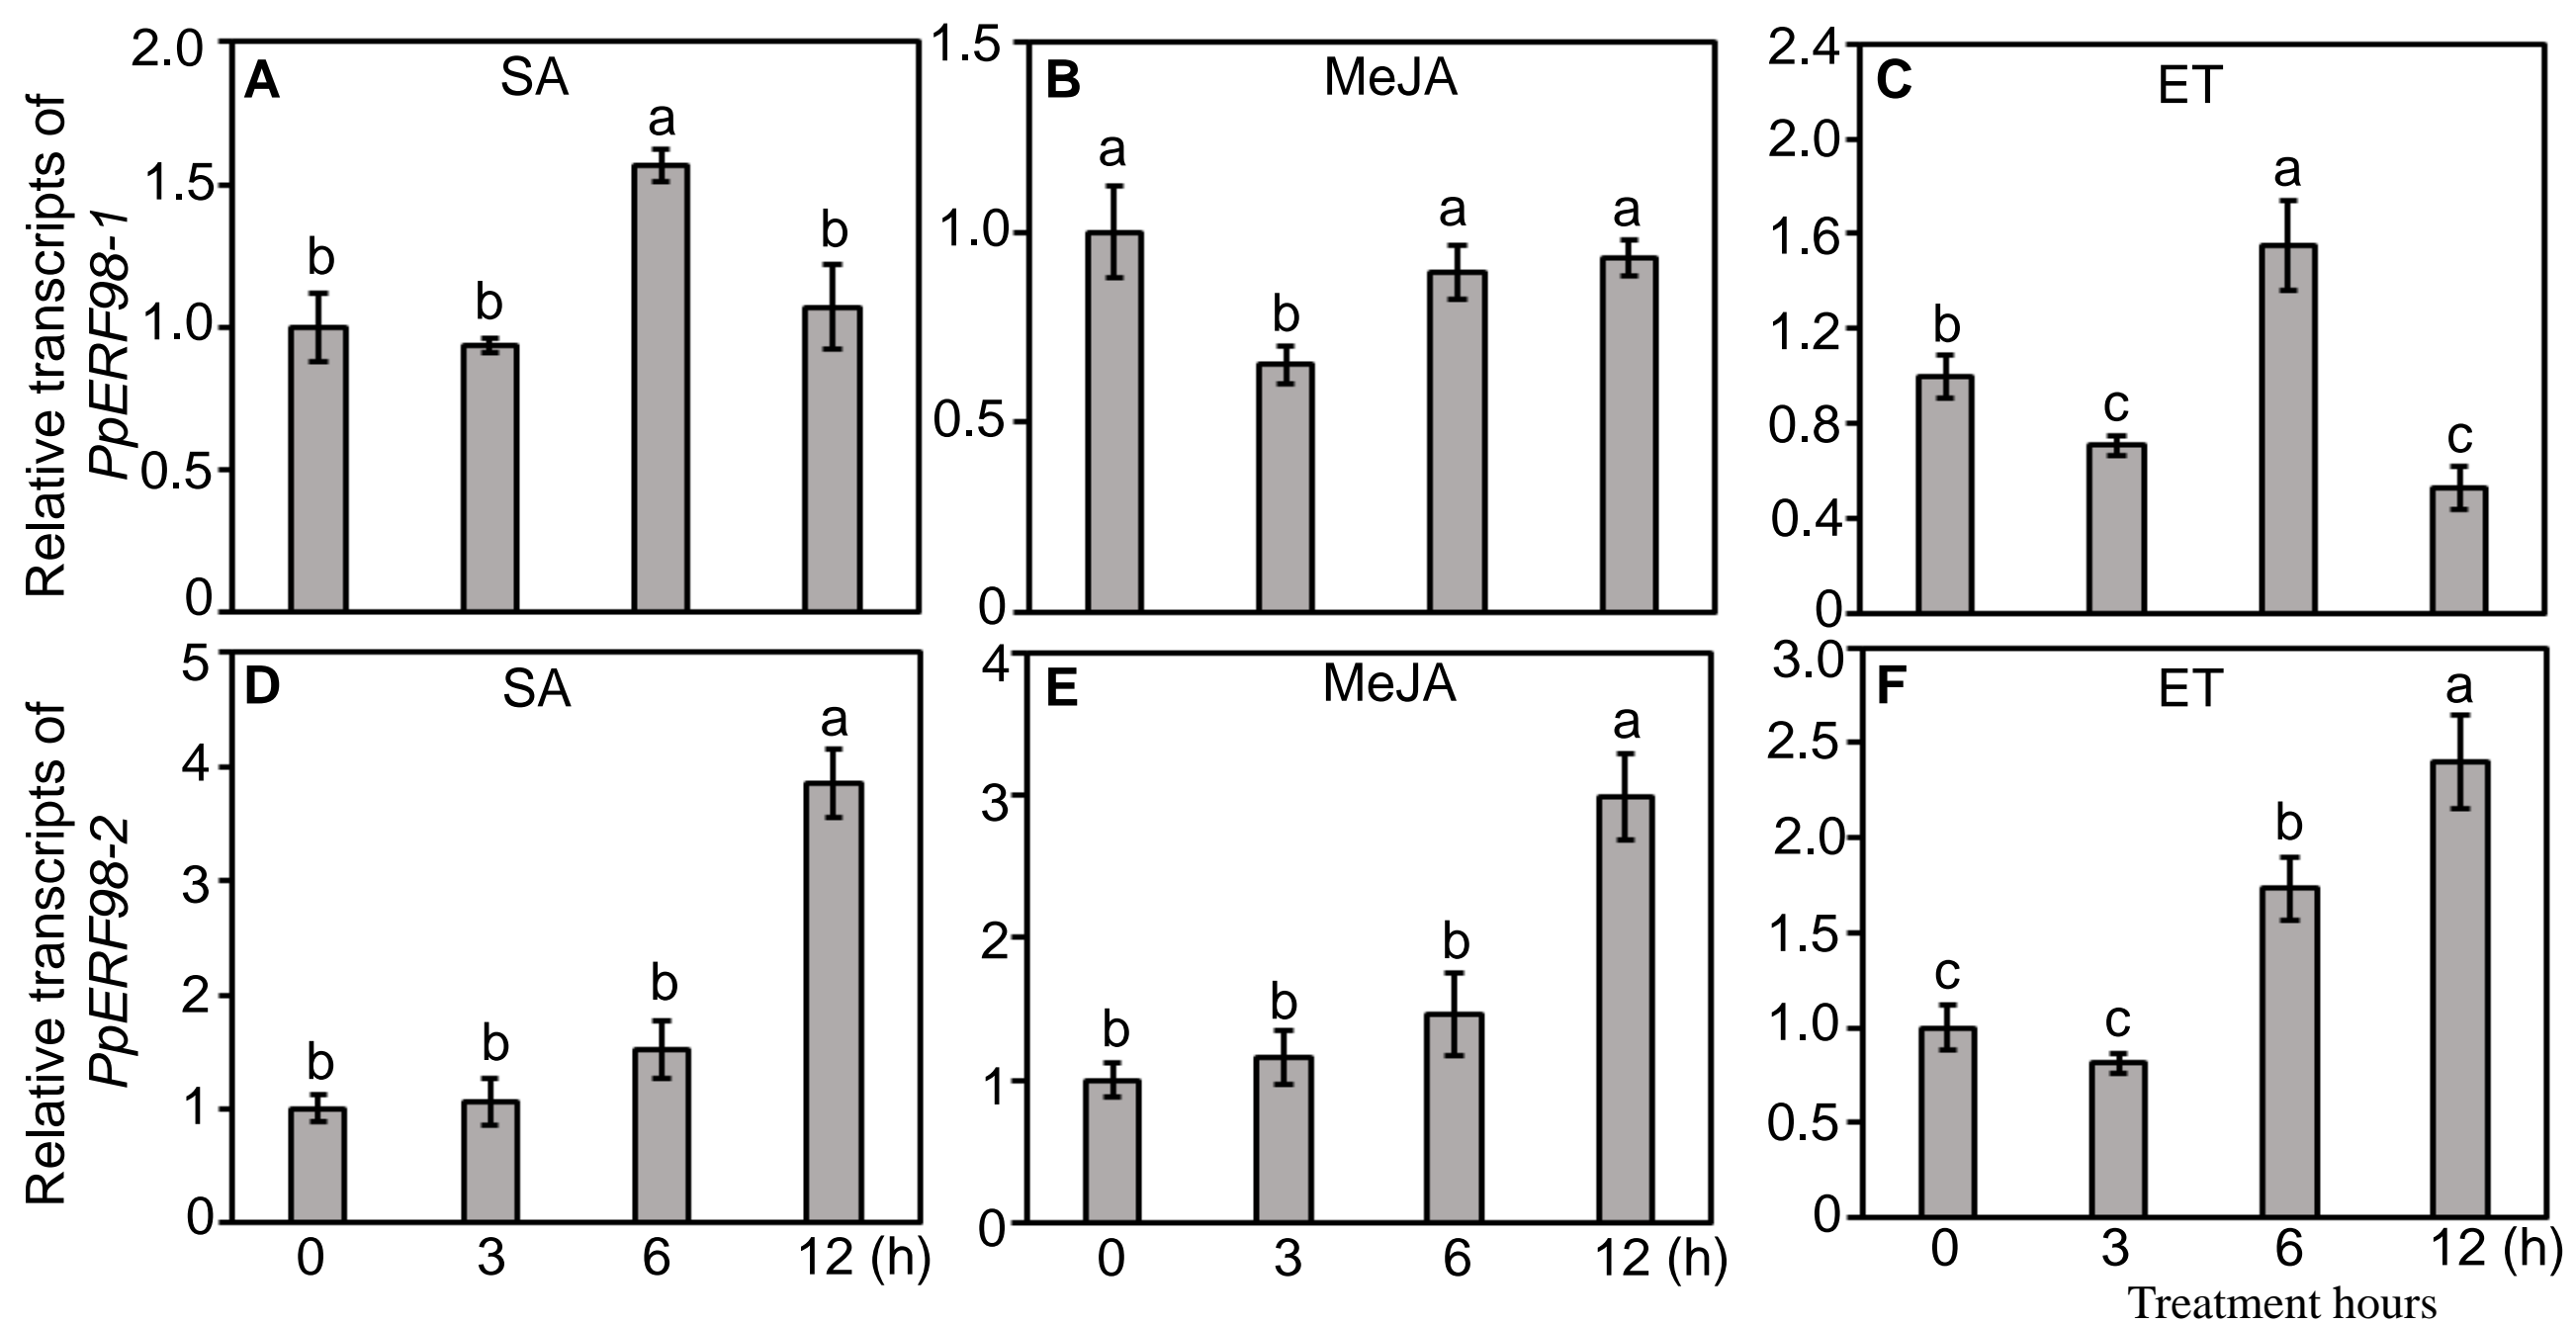

**Supplemental Figure S2. Transcriptional response of *PpERF98-1* and 2 to hormonal treatment of peach shoots.** (A-C) Transcript levels of *PpERF98-1* in peach shoots after treatment with 500  $\mu$ M salicylic acid (SA), 100  $\mu$ M methyl jasmonate (MeJA) and 10  $\mu$ L L<sup>-1</sup> gaseous ethylene (ET). (D-F) Relative transcripts of *PpERF98-2* after SA, MeJA and ET treatments. Gene transcripts were normalized on *PpTEF2* and are displayed as fold changes over values at time 0 h (which are therefore set to 1). Data are means  $\pm$  SD of three biological replicates and four analytical replicates. Different letters on top of bars indicate statistical significance at  $P < 0.05$  based on Duncan's post hoc test.

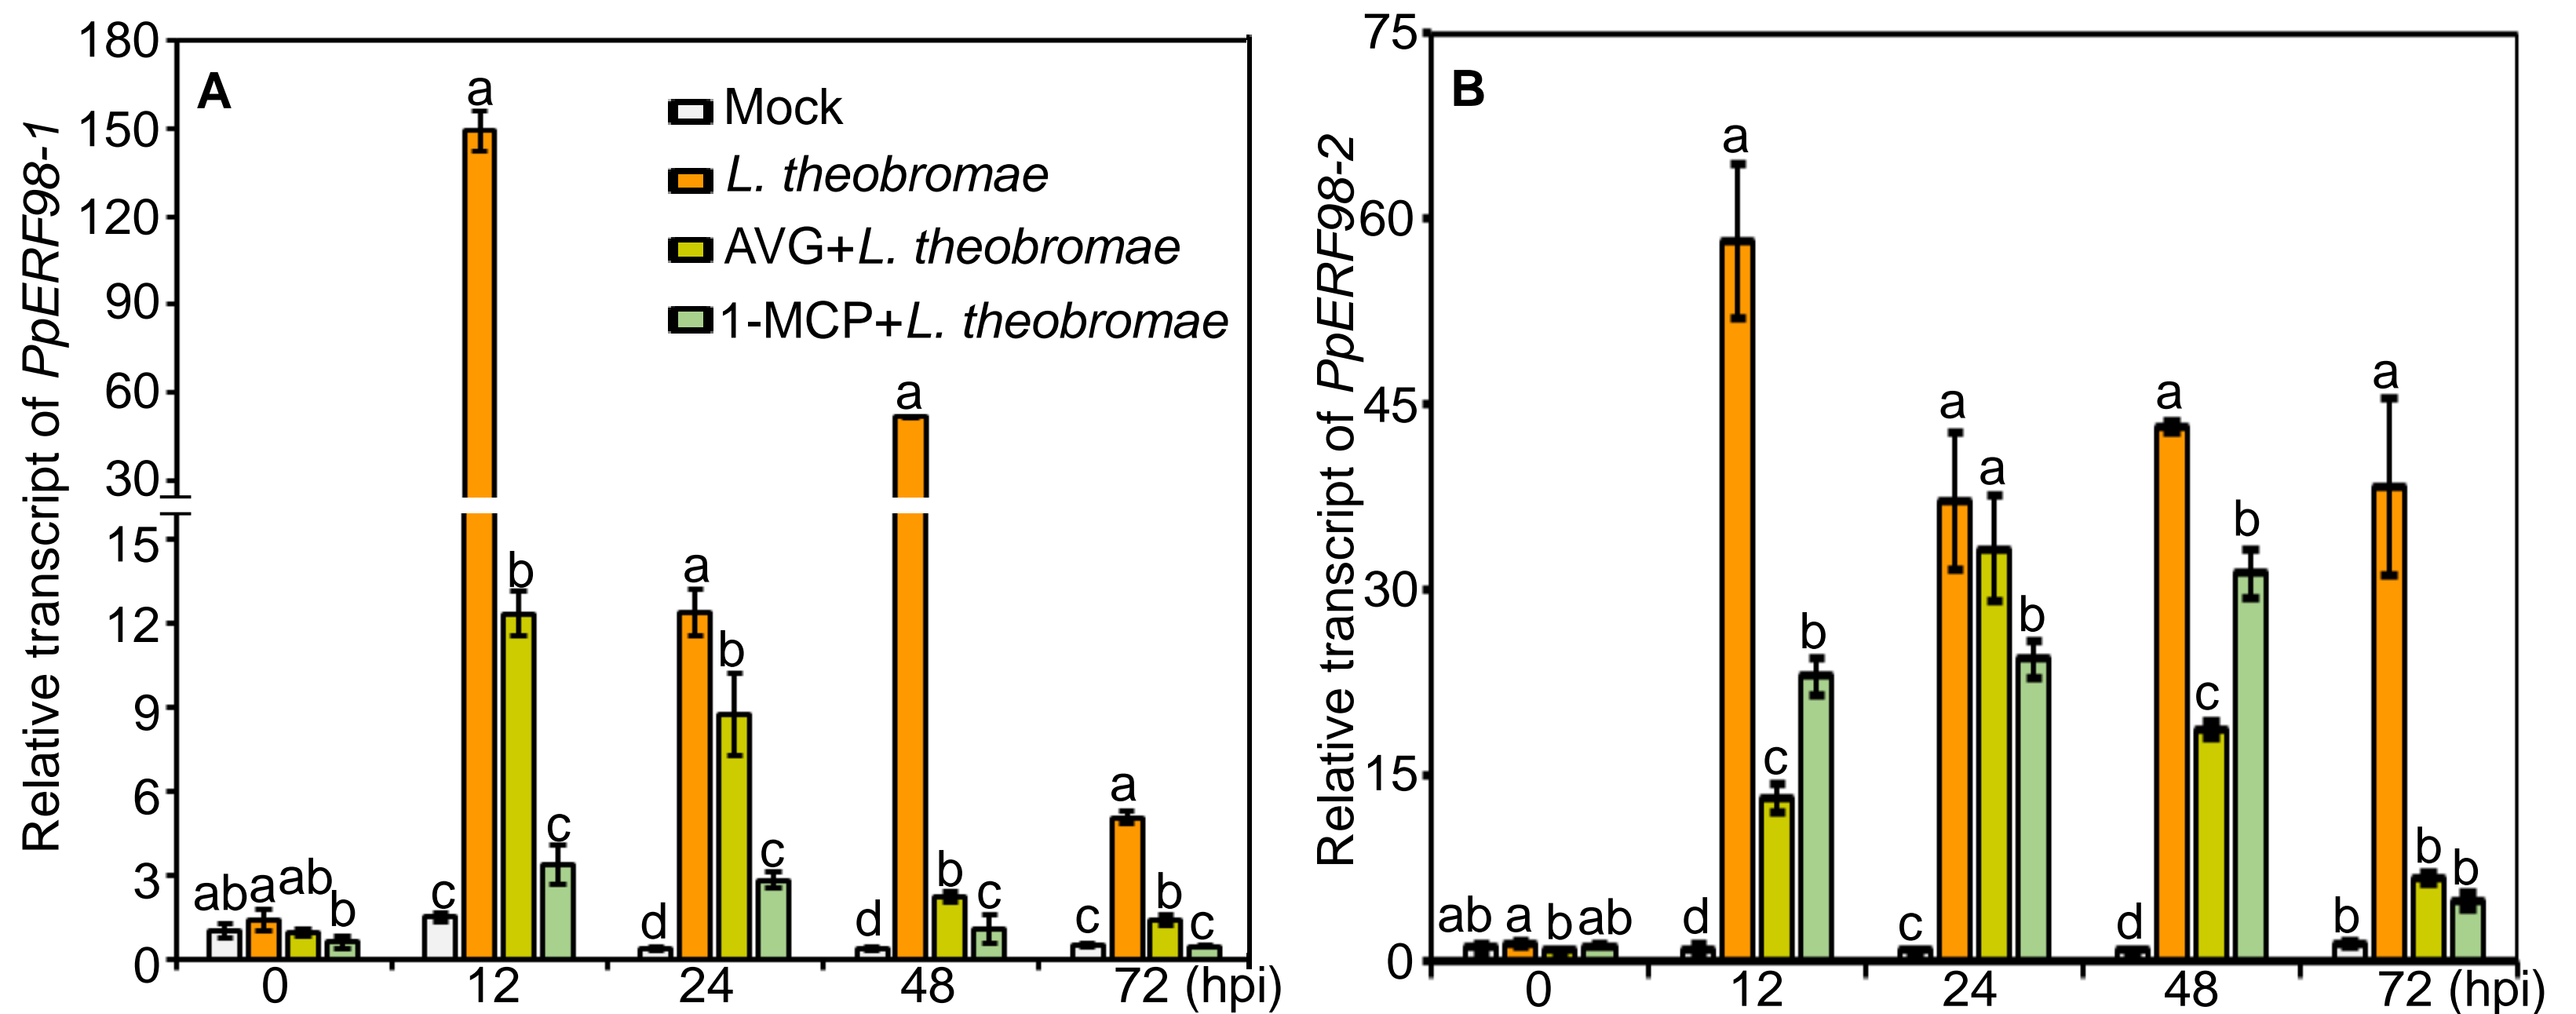

**Supplemental Figure S3. Relative transcripts of *PpERF98-1* and 2 in the inoculated peach shoots pretreated with ethylene inhibitors.** Transcript levels of *PpERF98-1* (A) and 2 (B) in the ethylene (ET) inhibitors-pretreated shoots at different hours post *L. theobromae* inoculation (hpi). Mock: the peach shoots were pretreated with ddH<sub>2</sub>O and inoculated with sterile PDA plugs; AVG/1-MCP+*L. theobromae*: the peach shoots were pretreated with the ET biosynthetic inhibitor AVG (aminoethoxyvinylglycine, 15 ng mL<sup>-1</sup>) or signaling inhibitor 1-MCP (1-methylcyclopropene, 0.1 mg mL<sup>-1</sup>) for 24 h before *L. theobromae* inoculation. Relative transcript levels of the tested genes were normalized on the reference gene *PpTEF2*, and are displayed in relation to the transcript levels in mock samples at time 0 (which was therefore set to 1). Different letters show statistical significance of different treatments at the same time point and  $P < 0.05$  based on Duncan's post hoc test. Error bars represent are means  $\pm$  SD of three independent replicates, and each in four analytical replicates.

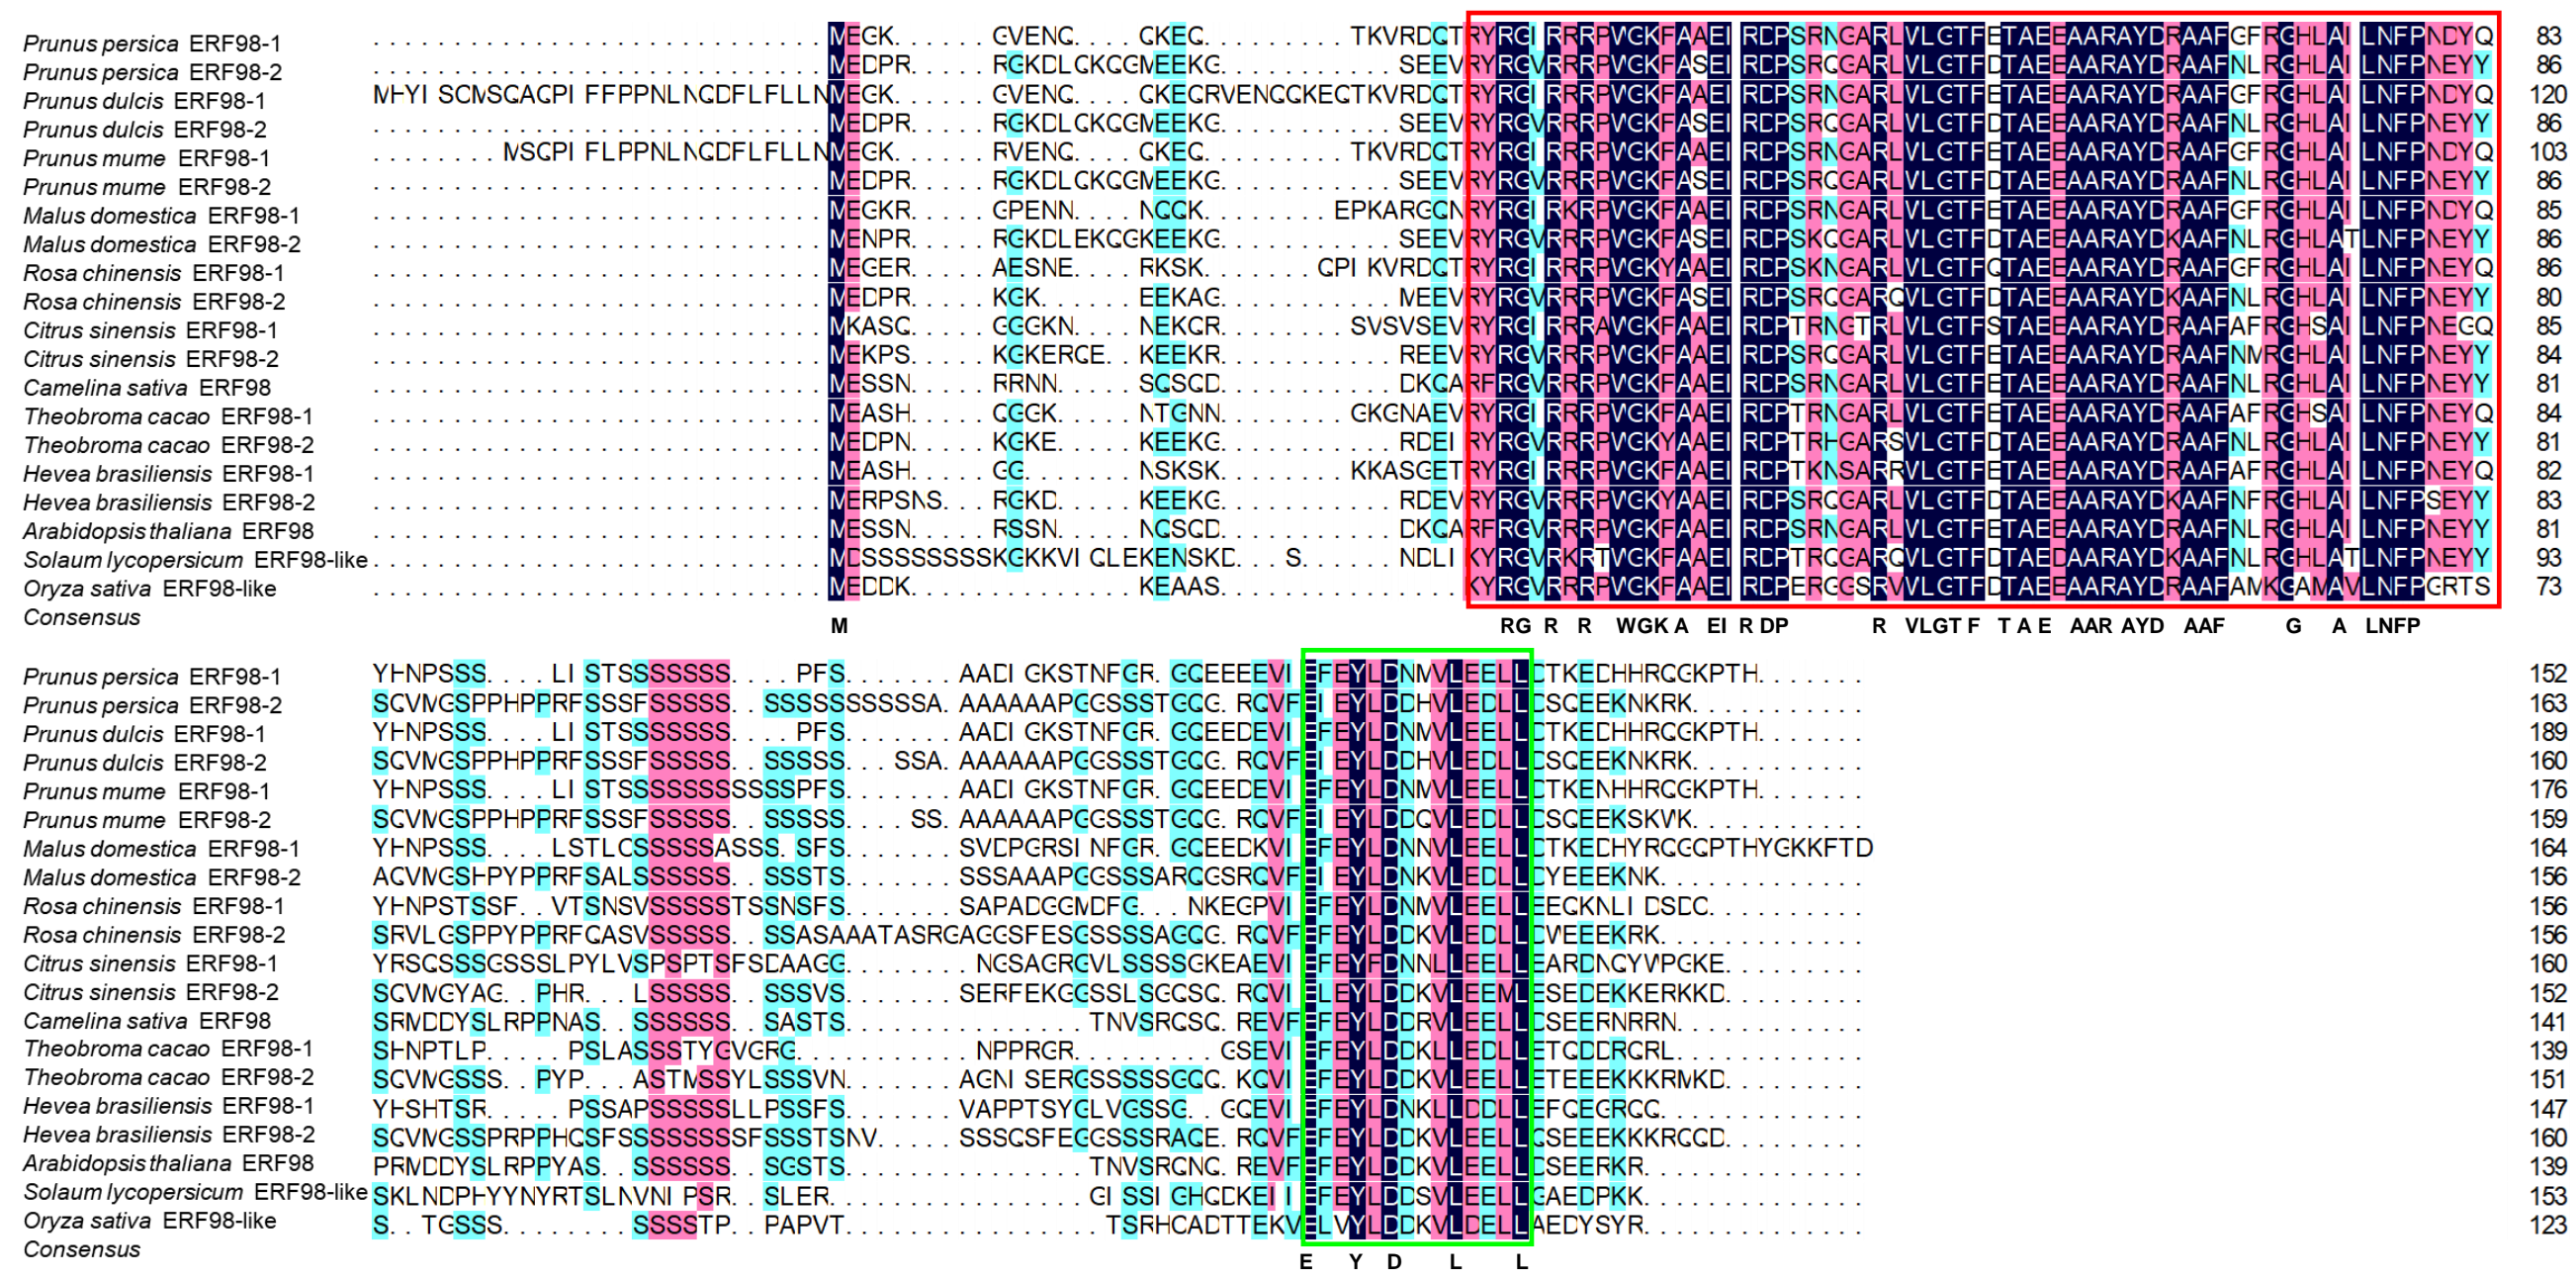

**Supplemental Figure S4. Amino acid alignment of PpERF98-1 and 2 and their homologs from other plant species.** Deep blue shaded amino acids are the most conserved, followed by red, and light blue as least conserved. The conserved AP domain and residues EDLL are highlighted in red and green boxes, respectively. Numbers by the sequences represent the amino acid position in the full-length protein sequence.

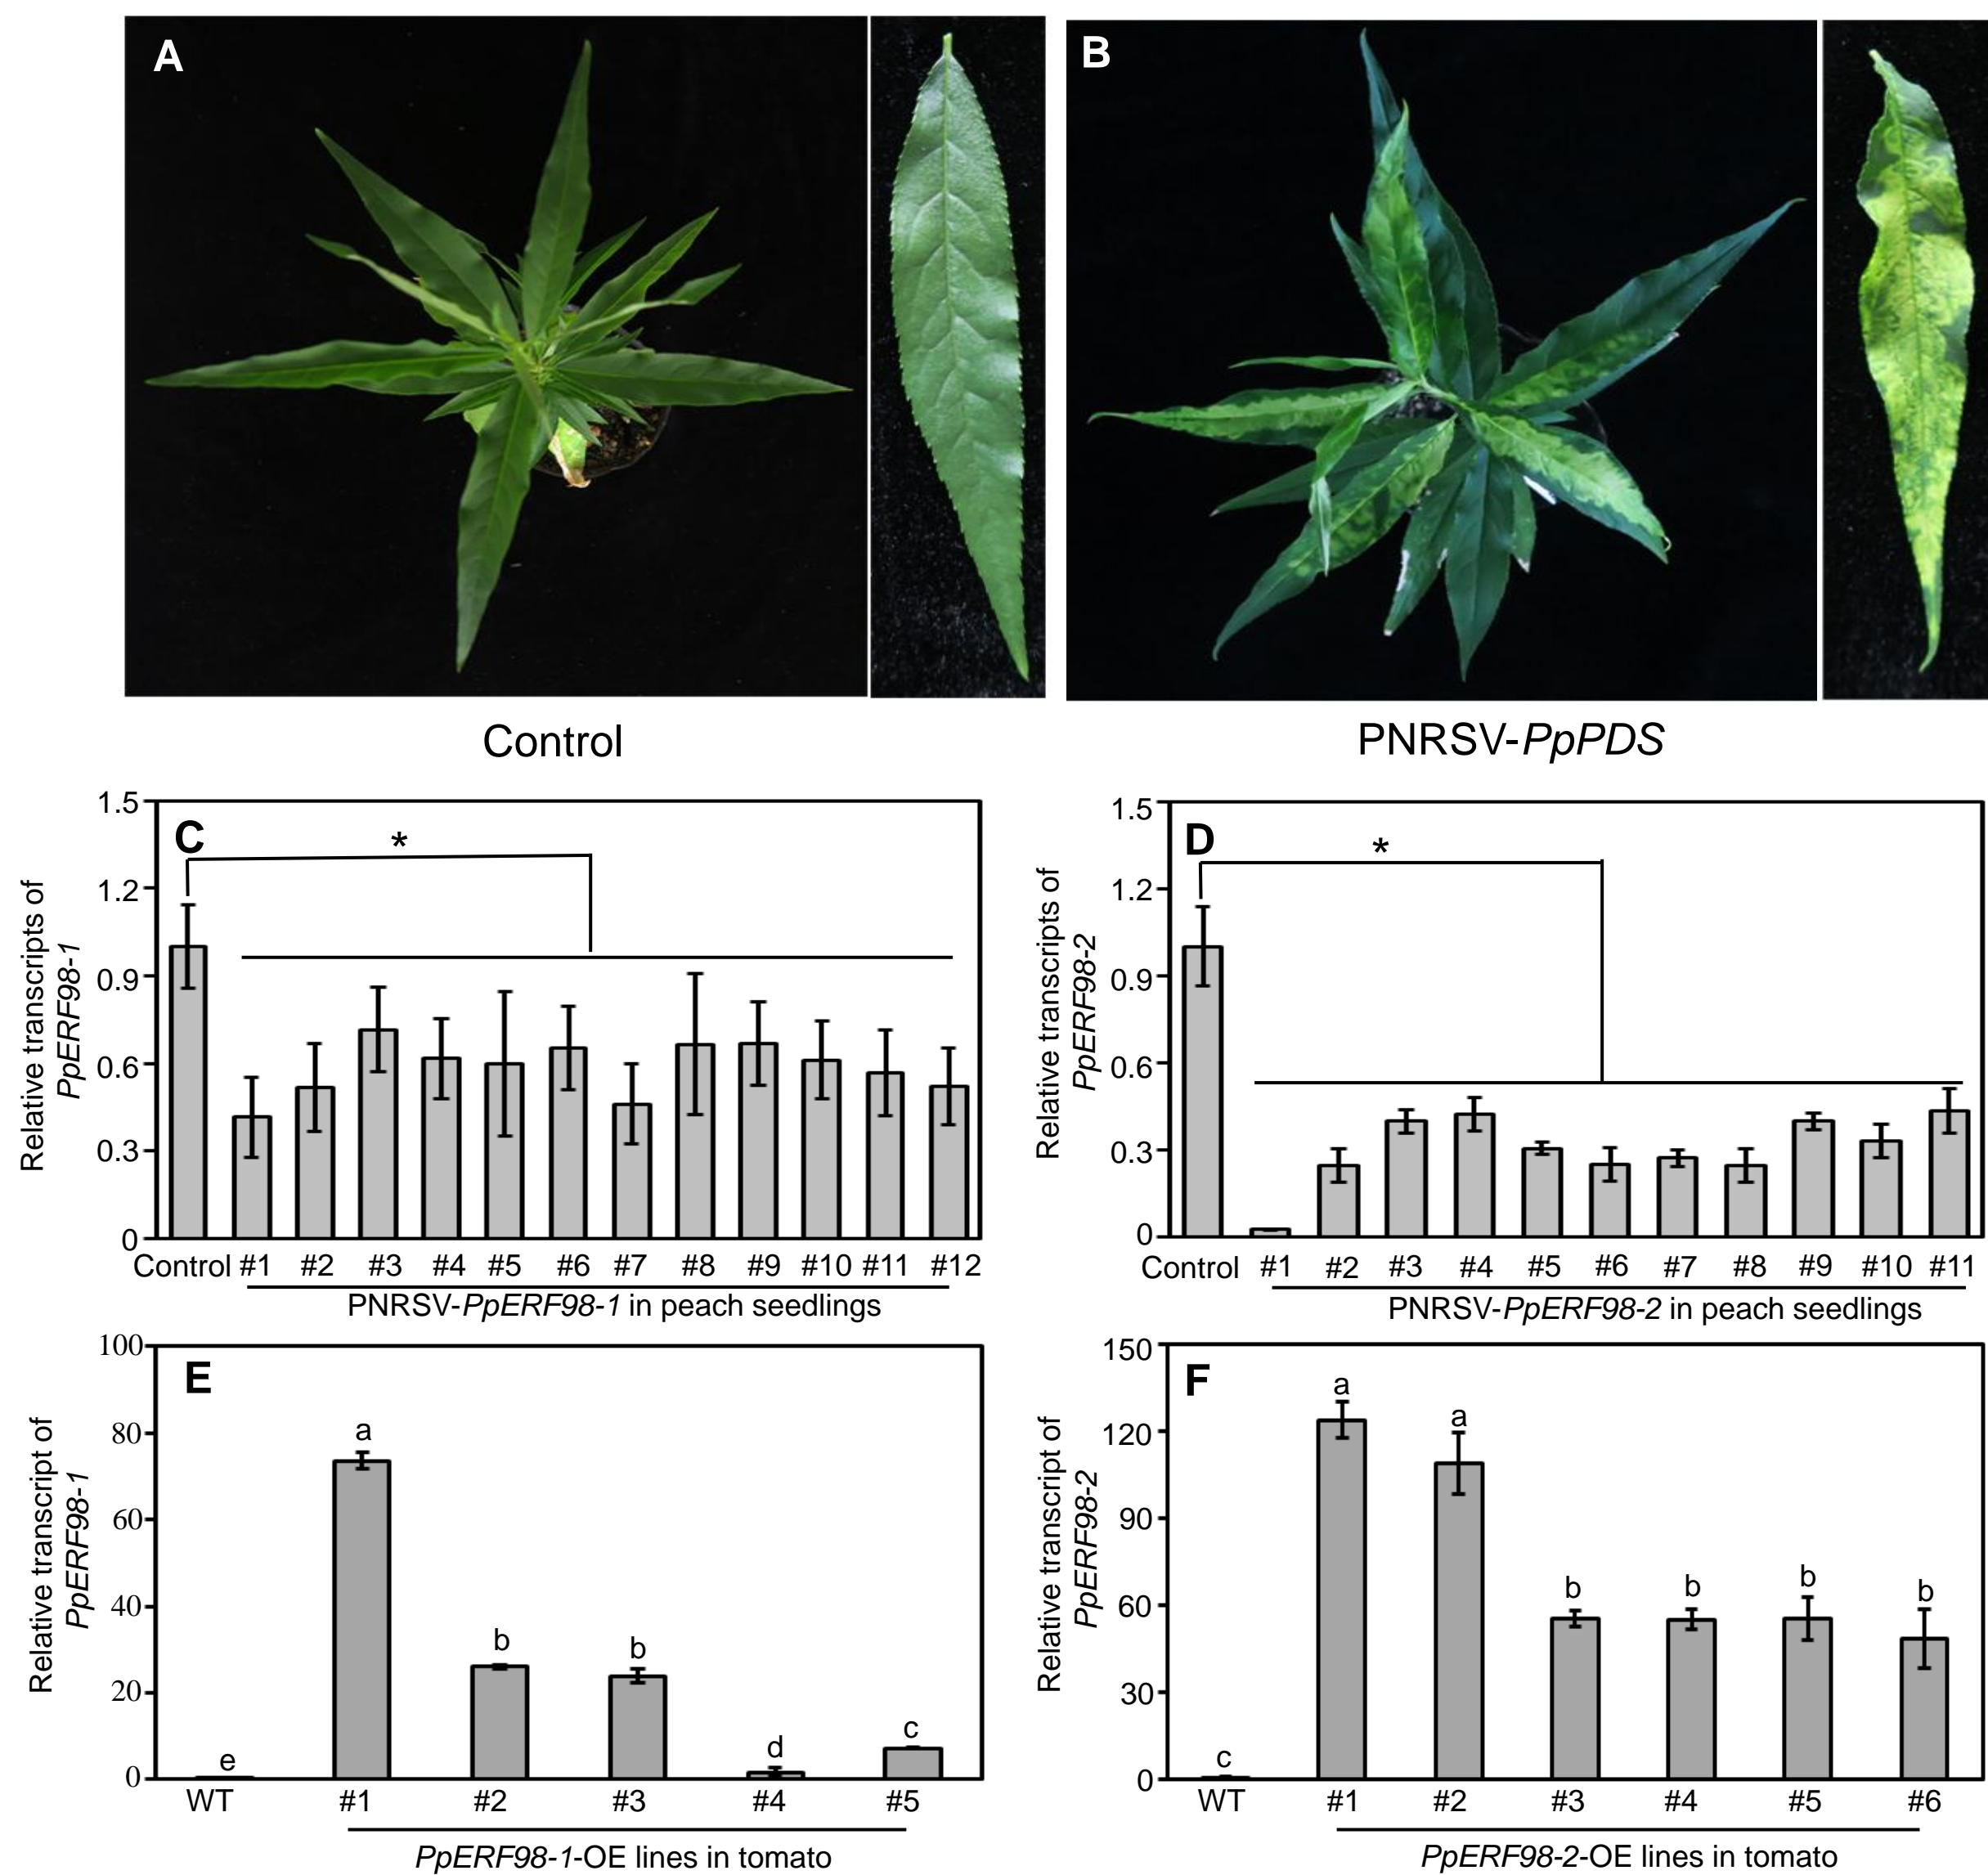

**Supplemental Figure S5. Phenotype of two-week-old *PpPDS*-silenced peach seedlings created by virus-induced gene silencing (VIGS) and molecular characterization of the transgenic peach plants and tomato lines.** (A and B) The VIGS system was implemented using a *Prunus* necrotic ringspot virus (PNRSV)-based vector. The phenotype of peach seedlings infiltrated with *Agrobacterium tumefaciens* GV3101 harboring the PNRSV vector (control; A), or PNRSV-*PpPDS* (phytoene desaturase; B). Top views of seedlings are shown on the left image of each panel, and single leaves on the right. (C and D) RT-qPCR quantification of *PpERF98-1* and 2 transcript levels in peach plants transiently silenced in either gene by VIGS. The control was agroinfiltrated with empty PNRSV vector, and independent VIGS plants are numbered. (E and F) Transcript levels of *PpERF98-1* and 2 in tomato wild type (WT) and transgenic lines overexpressing either gene. Gene transcripts were normalized over the reference genes *PpTEF2* and *SlActin* in peach and tomato, respectively, and are displayed as transcripts fold change over control (WT) samples (which are therefore set to 1). Data are means  $\pm$  SD of three biological and four analytical replicates. Asterisks or different letters on top of bars indicate statistical significance between transgenic plants and corresponding controls at  $P < 0.05$  based on Duncan's post hoc test.

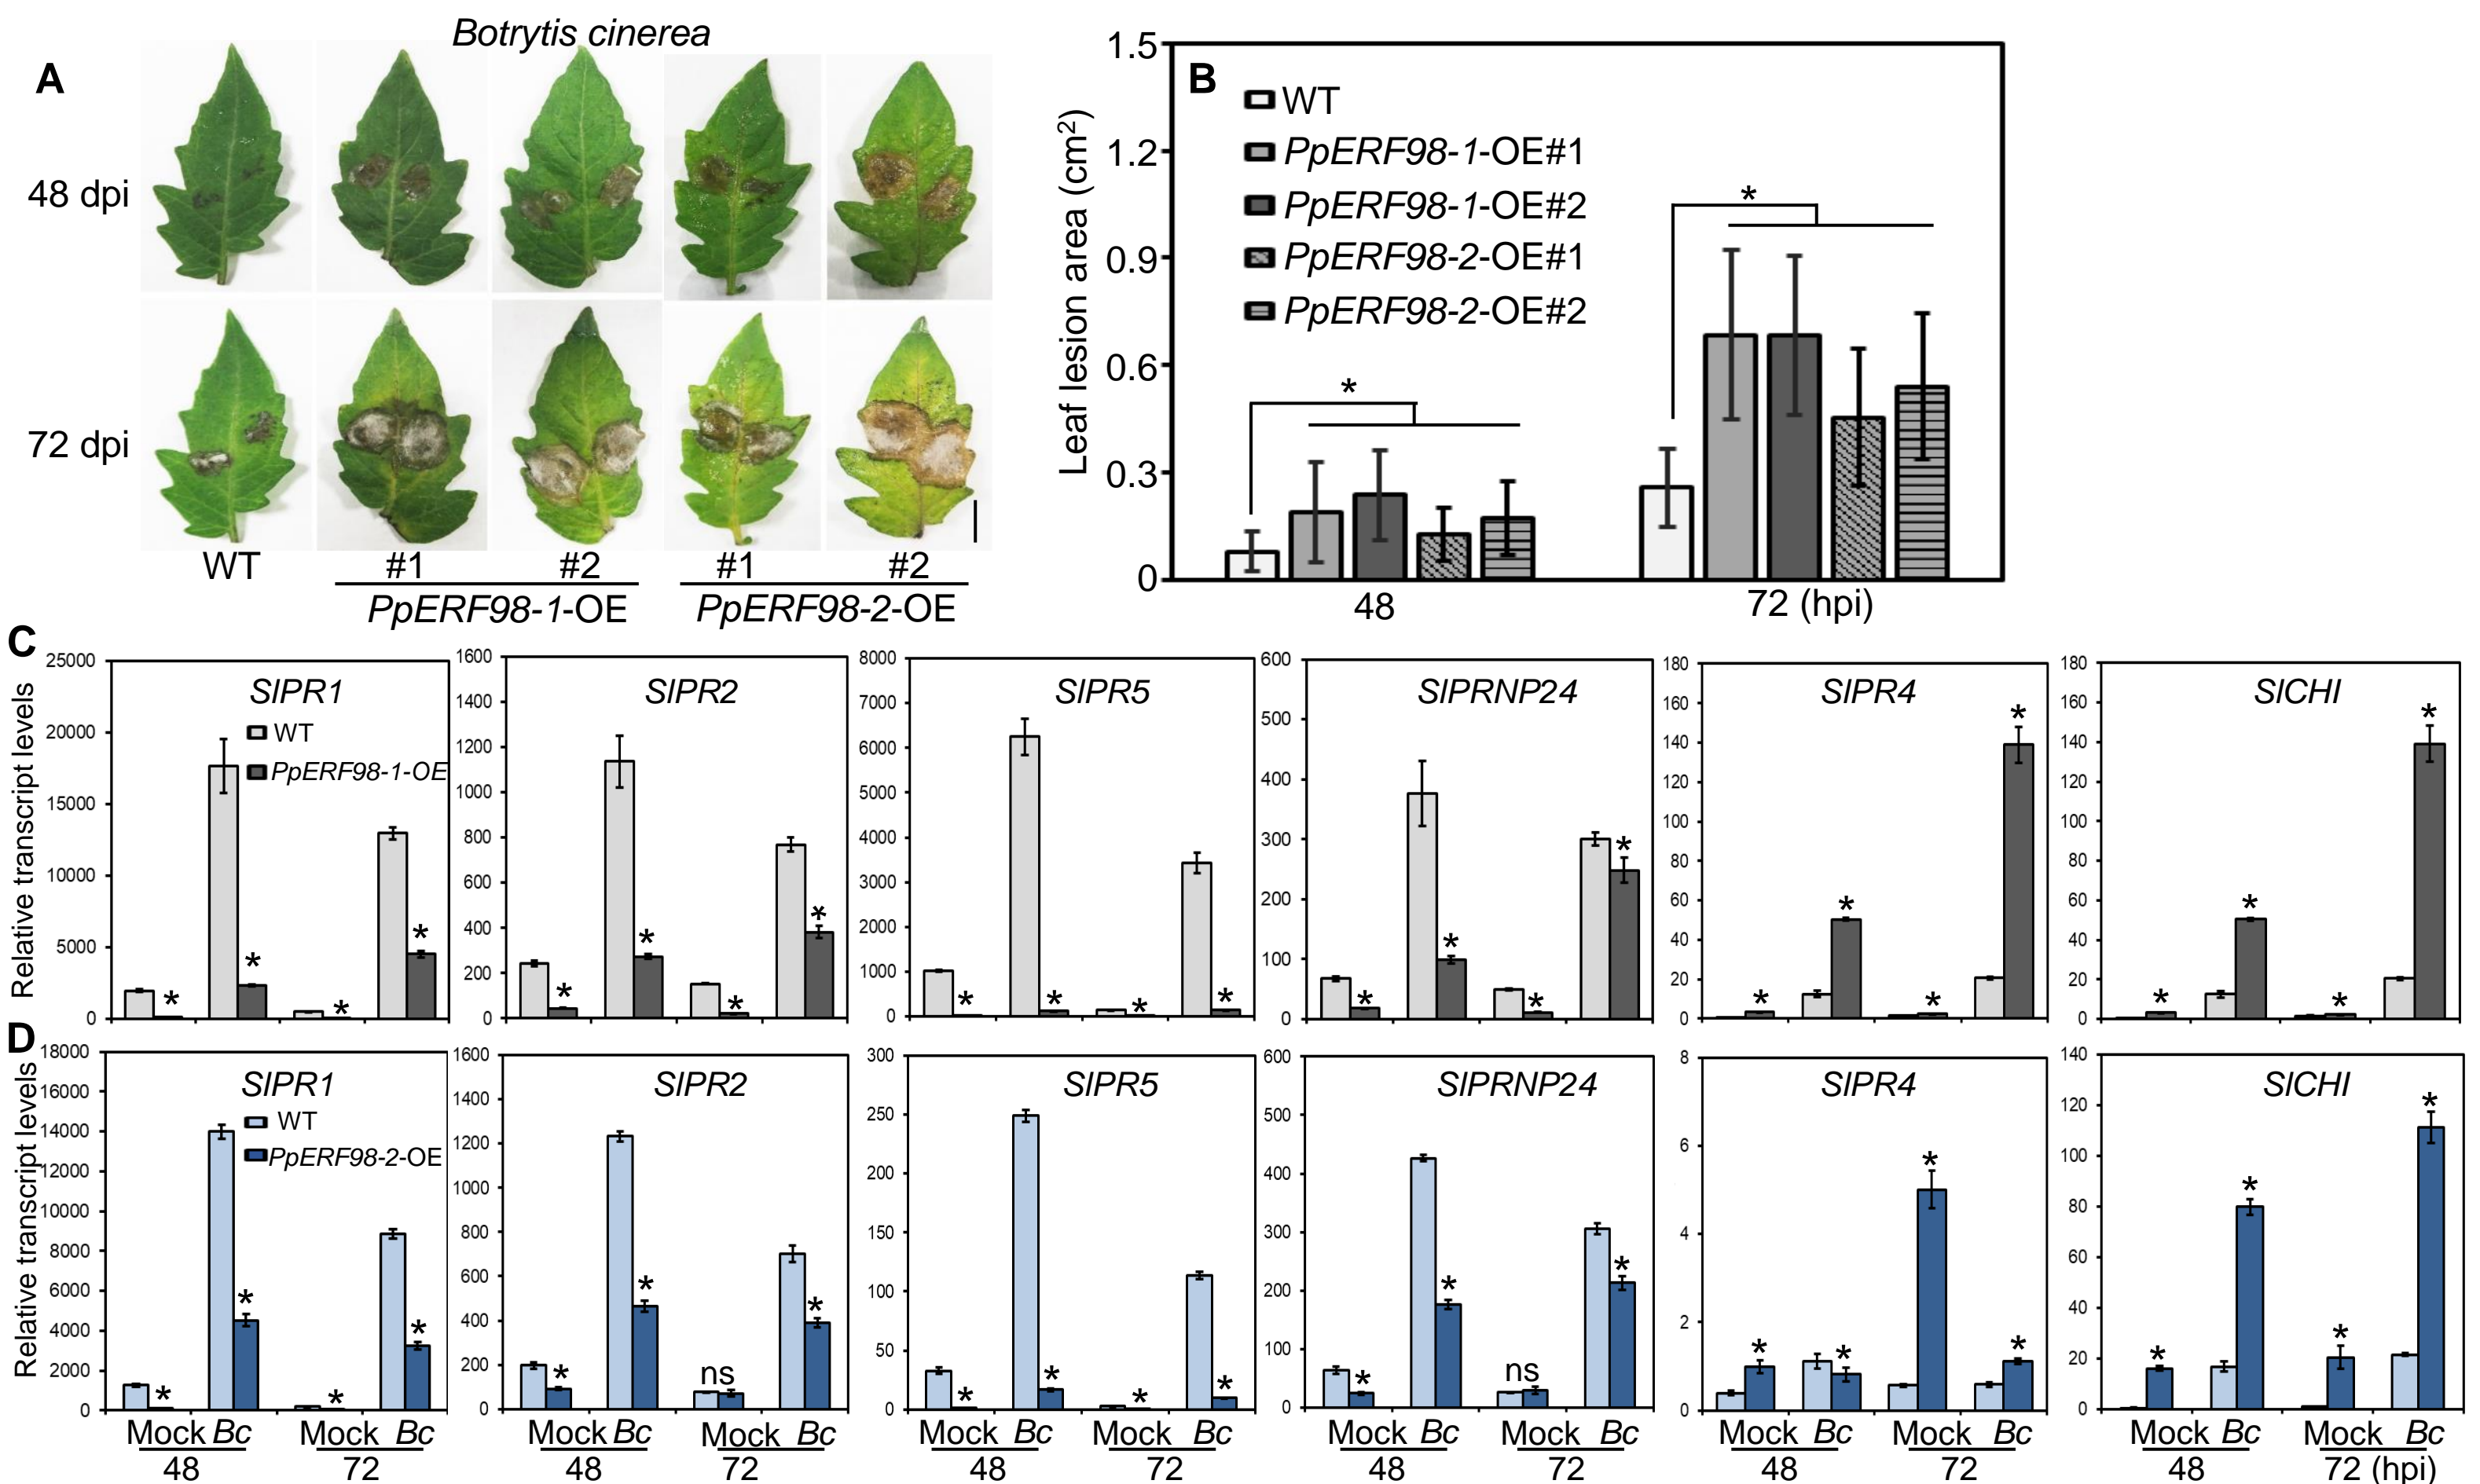

**Supplemental Figure S6. Constitutive heterologous overexpression of *PpERF98-1/2* increases the susceptibility of tomato plants to *Botrytis cinerea*.** (A and B) Leaf symptom and lesion areas of the tomato lines overexpressing *PpERF98-1/2* and WT (wild type) infected with *Botrytis cinerea* (*Bc*) at 48 and 72 h. Bar represents 1 cm. (C and D) Transcripts of *pathogenesis-related* (*PR*) genes [*SIPR1*, *SIPR2*, *SIPR5*, *SIPRNP24* (*Prion protein 24*), *SIPR4* and *SICH1* (*Chitinase*)] in the infected plants overexpressing *PpERF98-1/2*. Data are the means  $\pm$  SD of three independent replicates, with four analytical replicates for transcript quantification. Asterisks on top of bars indicate statistical significance at  $P < 0.05$  based on Student's *t* test, while ns indicates no significance.

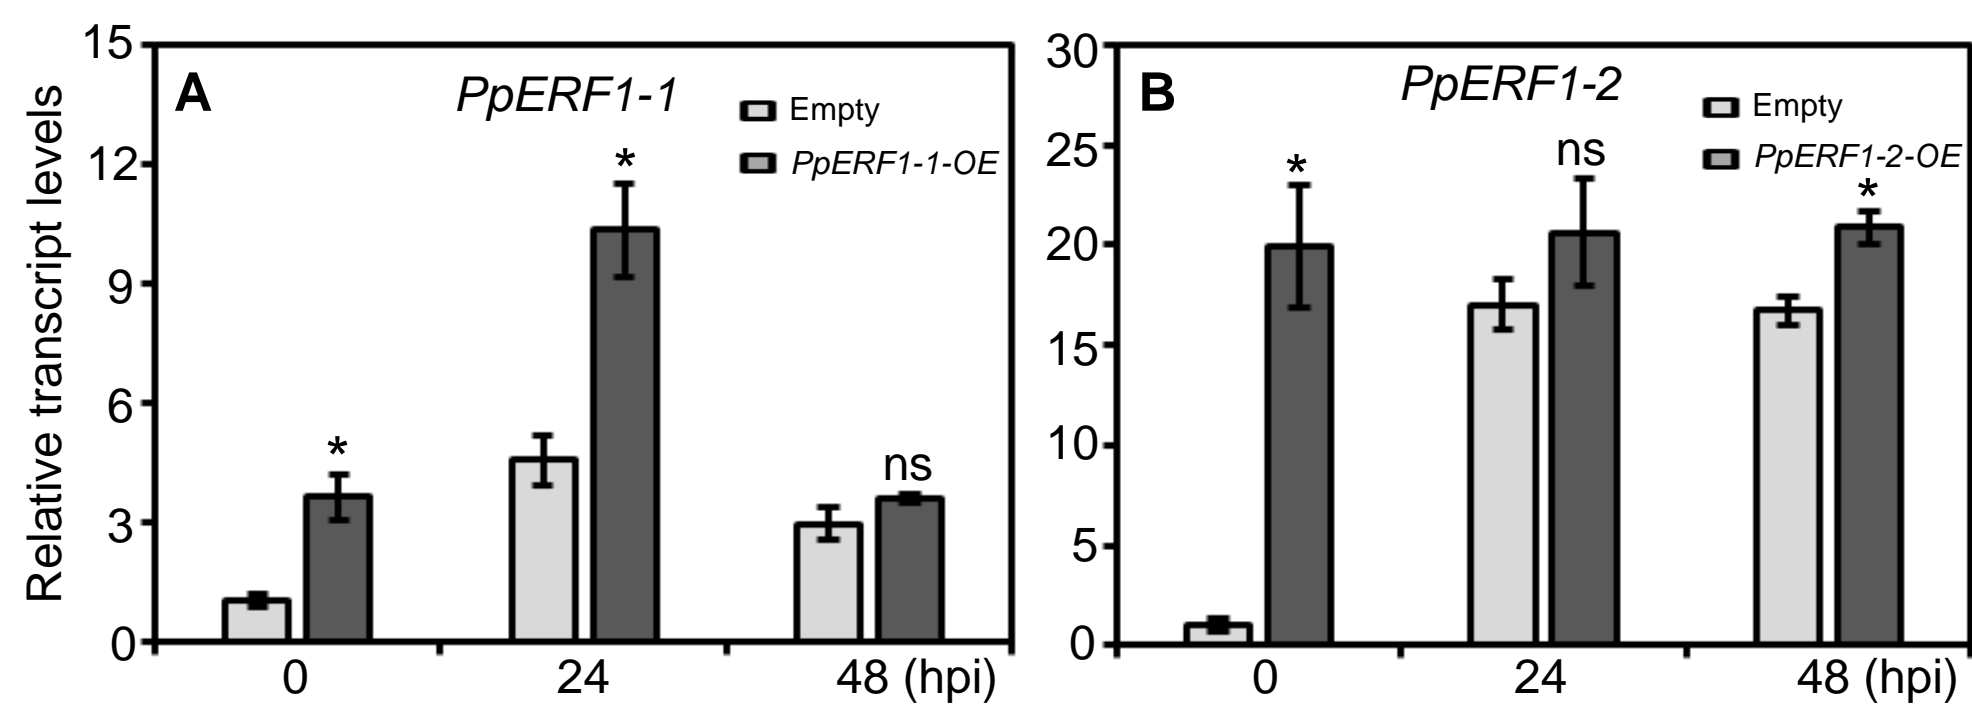

**Supplemental Figure S7. Relative transcript levels in peach seedlings transiently overexpressing *PpERF1-1* and 2.** Transcript abundance of *PpERF1-1* (A) and 2 (B) was analyzed in the peach seedlings transformed with *PpERF1*-overexpression (OE) or the empty (Empty) vector after *L. theobromae* inoculation at different hours. Data are means  $\pm$  SD of three independent replicates, each in four analytical replicates for transcript quantification. Asterisks on top of paired bars indicate statistical significance between transgenic and control plants at the same timepoint and  $P < 0.05$  based on Student's *t* test, while ns indicates no significance.

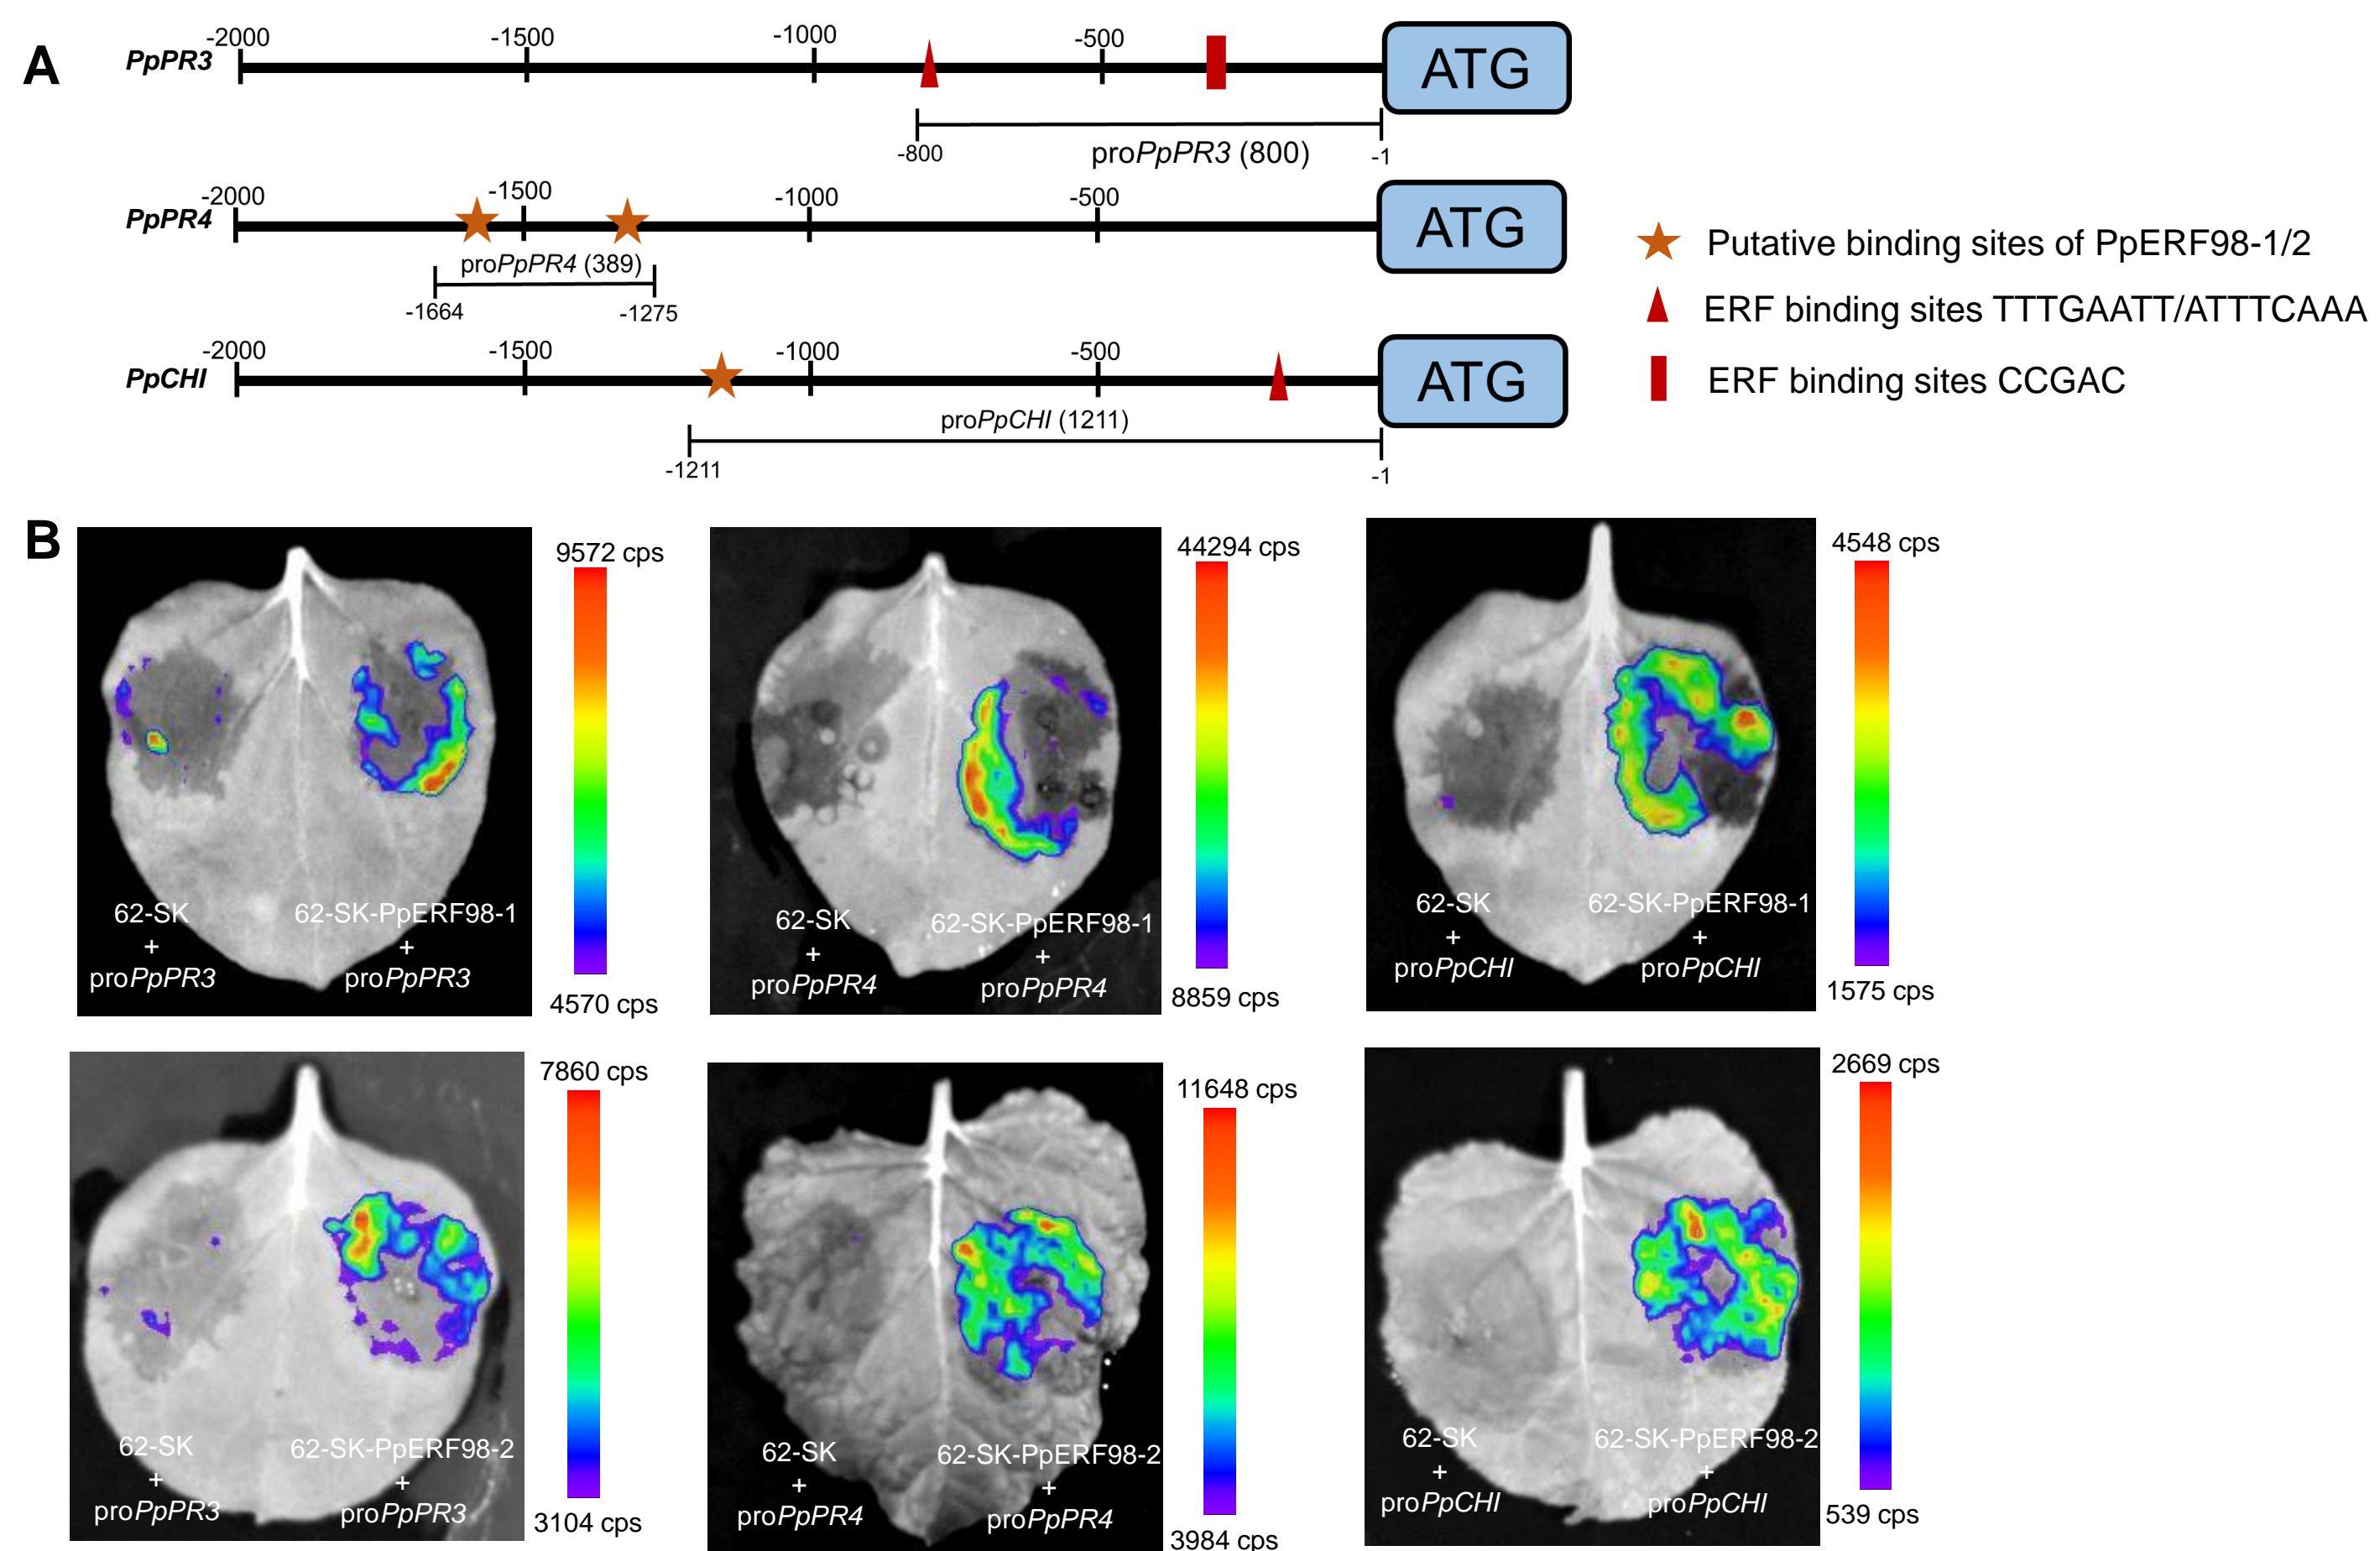

**Supplemental Figure S8. Binding test of PpERF98-1/2 with the promoters of *Pathogenesis-related genes (proPpPRs)*.** (A) Diagram of fragments acting as reporters in the luciferase (LUC) activity assay. Numbers above the green bold lines and below the lower slim fragments indicate nucleotide position at the 5'-3' end of each fragment relative to the translation start-site (ATG). The slim fragments were used for reporter constructs. Red pentagrams stand for the putative binding sites of PpERF98-1/2 as identified by the MEME software, while red and green triangles indicate the ERF (ethylene response factor) binding sequences TTTGAATT/ATTTCAAA and CCGAC, respectively, in the promoters of the tested genes. (B) Transient expression assays showing that both PpERF98-1 and 2 could activate the transcripts of *PpPR3*, *PpPR4* and *PpCHI*. Imaging of tobacco leaves 48 h after infiltration shows that the co-infiltration with reporter and effector pairs triggers luminescence emission.



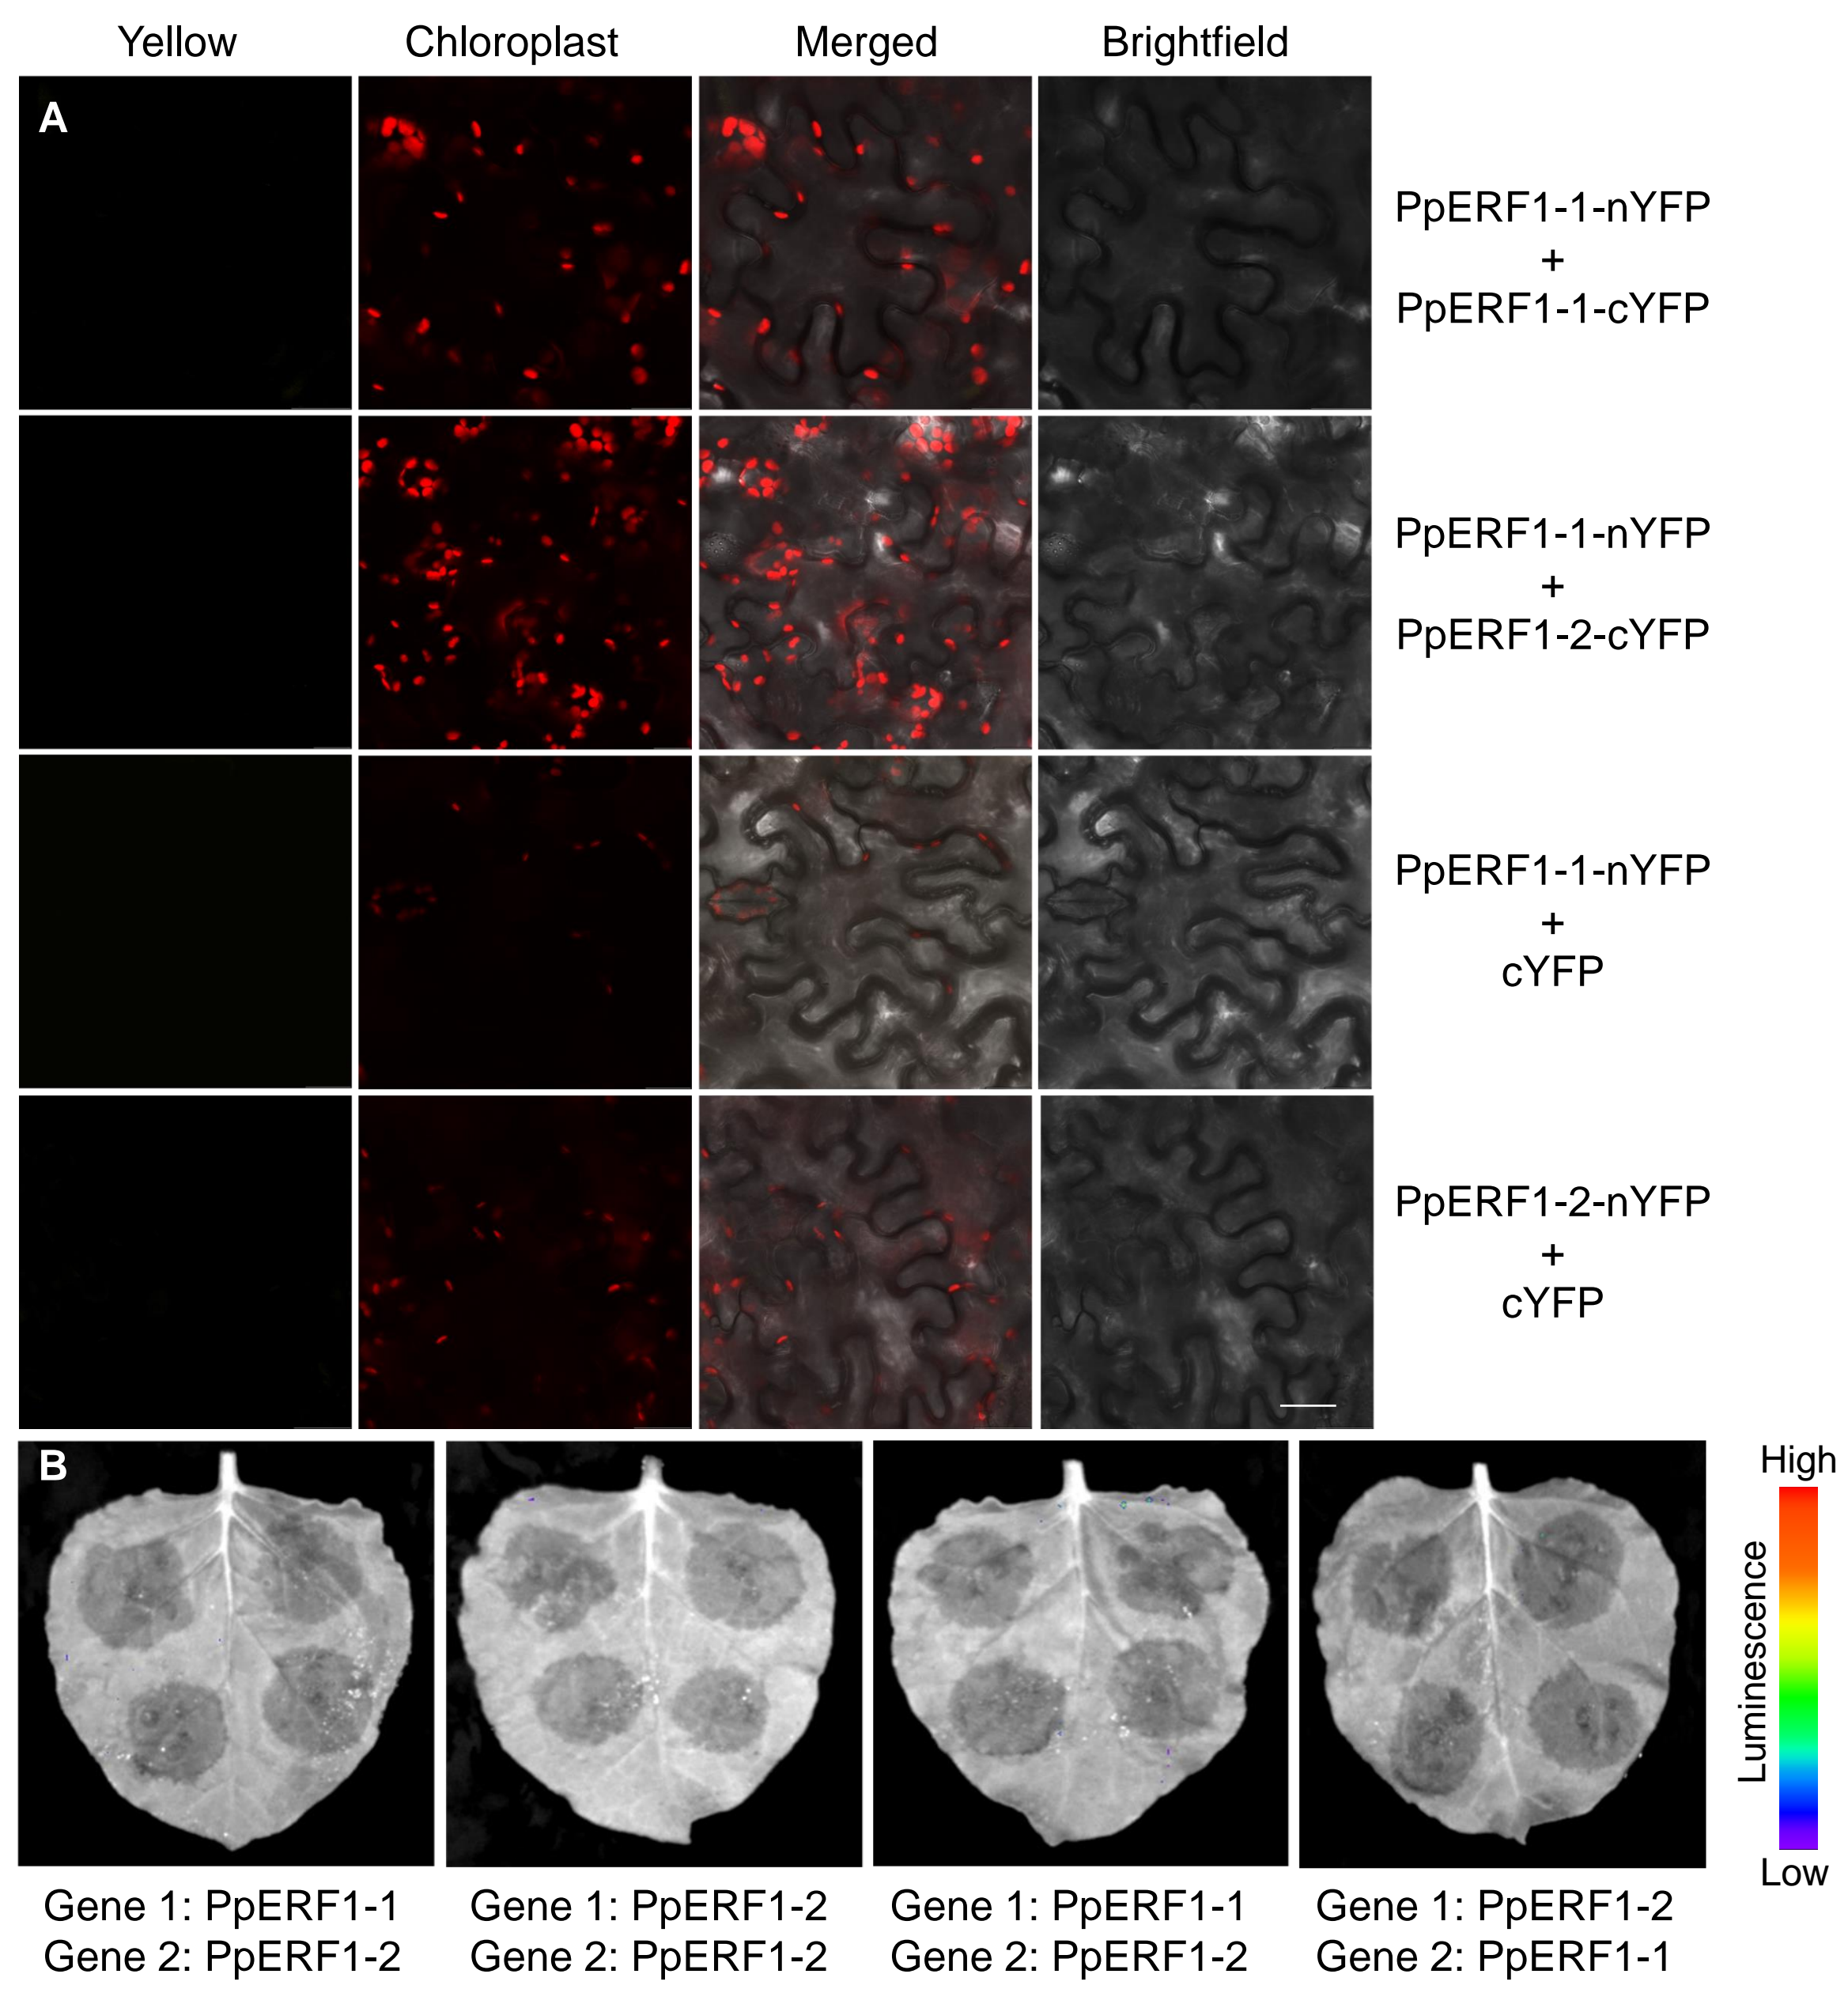

**Supplemental Figure S9. PpERF1-1 and 2 cannot form hetero- and homo-dimers with each other.** (A) BiFC assay of PpERF1-1 and 2 in tobacco leaf cells. No signal was detected when PpERF1-1/2-nYFP and PpERF1-1/2-cYFP were co-expressed. Scale bar = 20  $\mu$ m. (B) Interactions between PpERF1-1 and -2, and PpERF1 with itself as determined by LCI. Combinations of nLUC or cLUC with the corresponding PpERF1-1/2 constructs were used as negative controls.

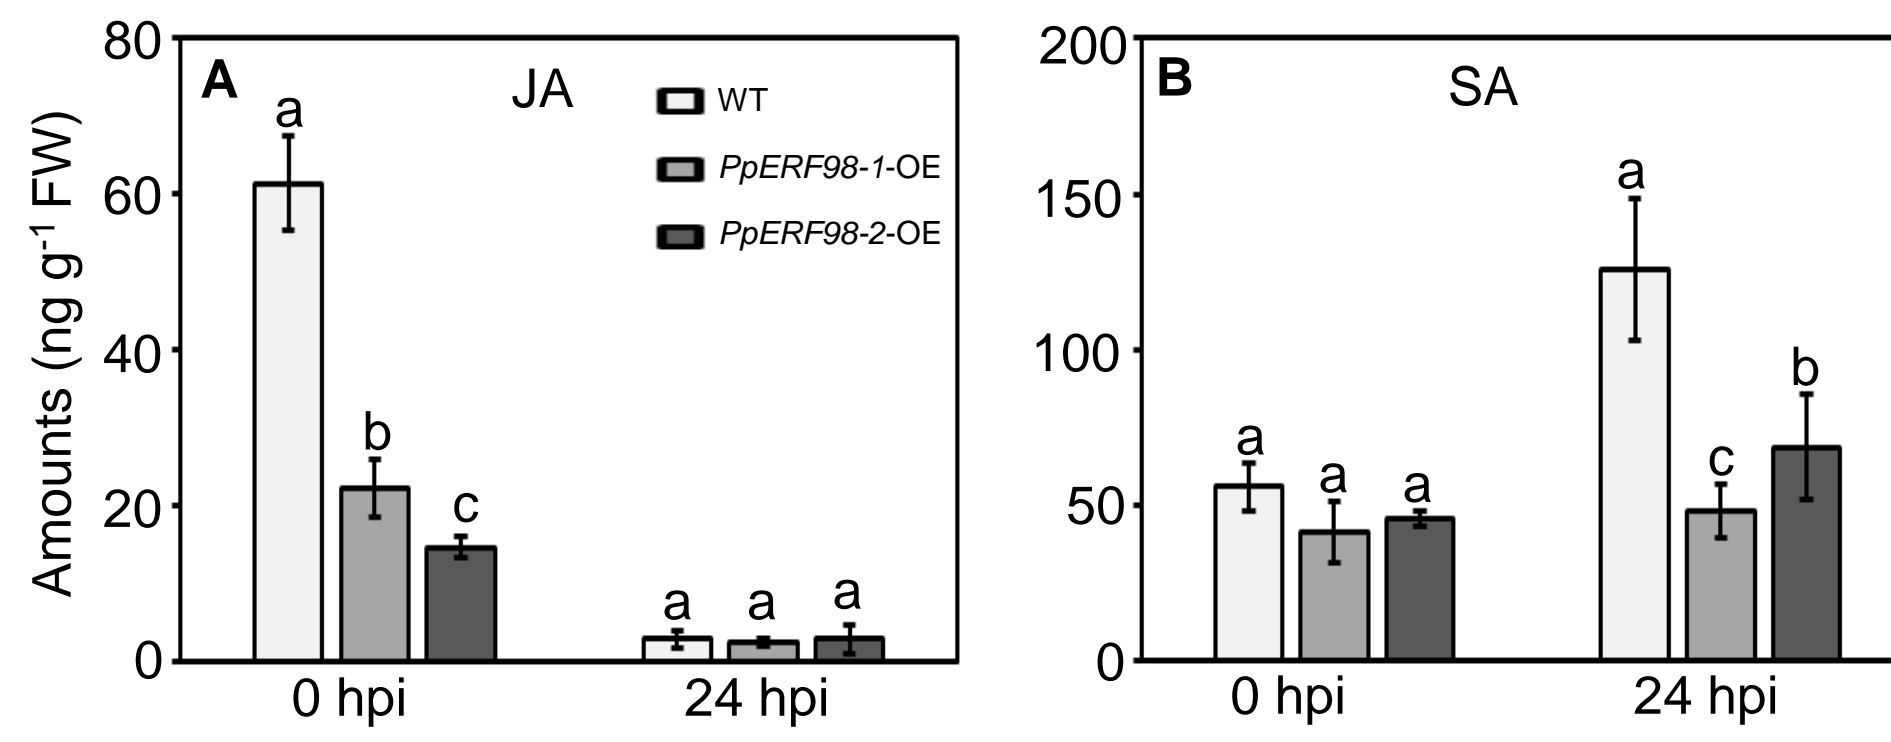

**Supplemental Figure S10. Contents of JA and SA in the *PpERF98-1/2*-overexpressing tomato lines inoculated with *L. theobromae* at 0 and 24 hpi.** Quantification of JA (A) and SA (B) in tomato plants. JA: jasmonate acid; SA: salicylic acid; FW: fresh weight. Data are means  $\pm$  SD of three biological replicates. Different letters on top of bars indicate statistical significance within the same timepoint based on Duncan's post hoc test at  $P < 0.05$ .

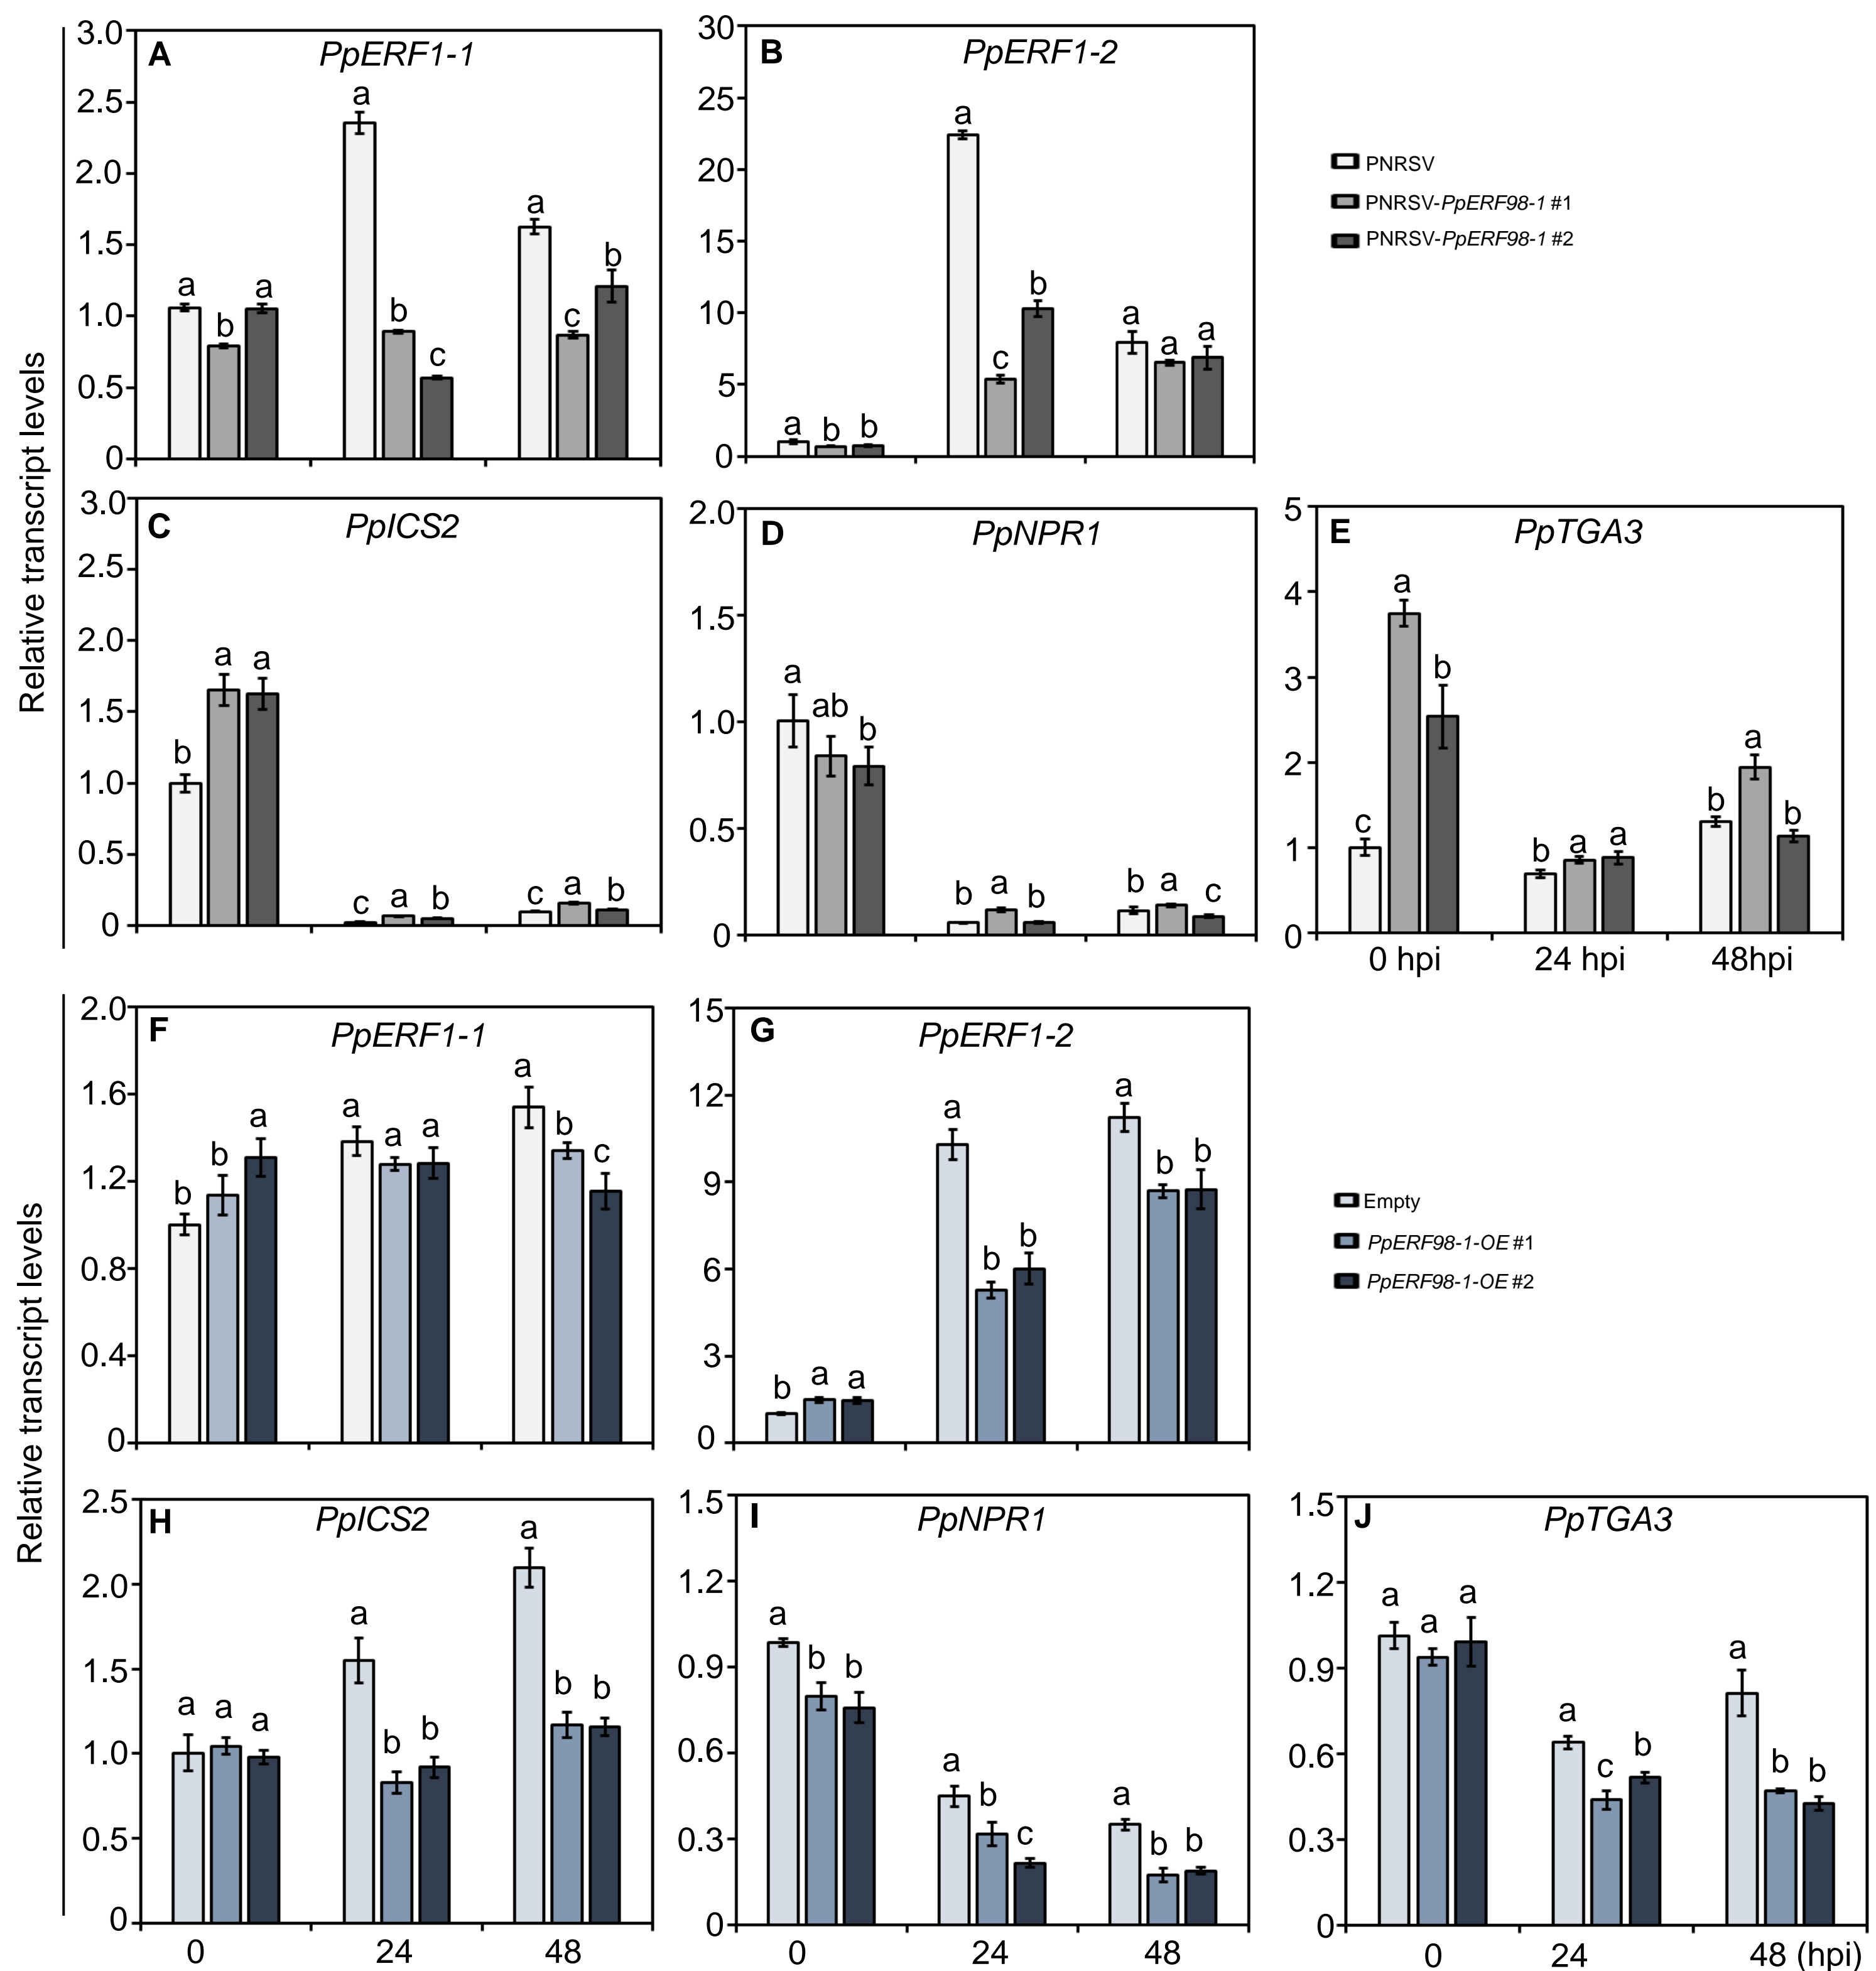

**Supplemental Figure S11. Transcripts of *PpERF1-1/2* and SA-related genes are affected by *PpERF98-1/2*.** (A-E) Relative transcript levels of *PpERF1-1*, *PpERF1-2*, *PpICS2*, *PpNPR1* and *PpTGA3* in the *PpERF98-1*-silenced peach seedlings and control (PNRSV) at 0, 24 and 48 hours post *L. theobromae* inoculation (hpi). (F-J): Transcript levels of *PpERF1-1*, *PpERF1-2*, *PpICS2*, *PpNPR1* and *PpTGA3* in peach seedlings transiently overexpressing *PpERF1-1* and control (Empty) inoculated with *L. theobromae*. Gene transcripts were normalized on the reference gene *PpTEF2* and are displayed as fold change over the mock-transformed, infected controls at time 0 hpi (which are therefore set to 1). Data are means  $\pm$  SD of three independent biological and four analytical replicates. Different letters represent statistically significant differences between treatments at the same timepoint and  $P < 0.05$  based on Duncan's post hoc test.

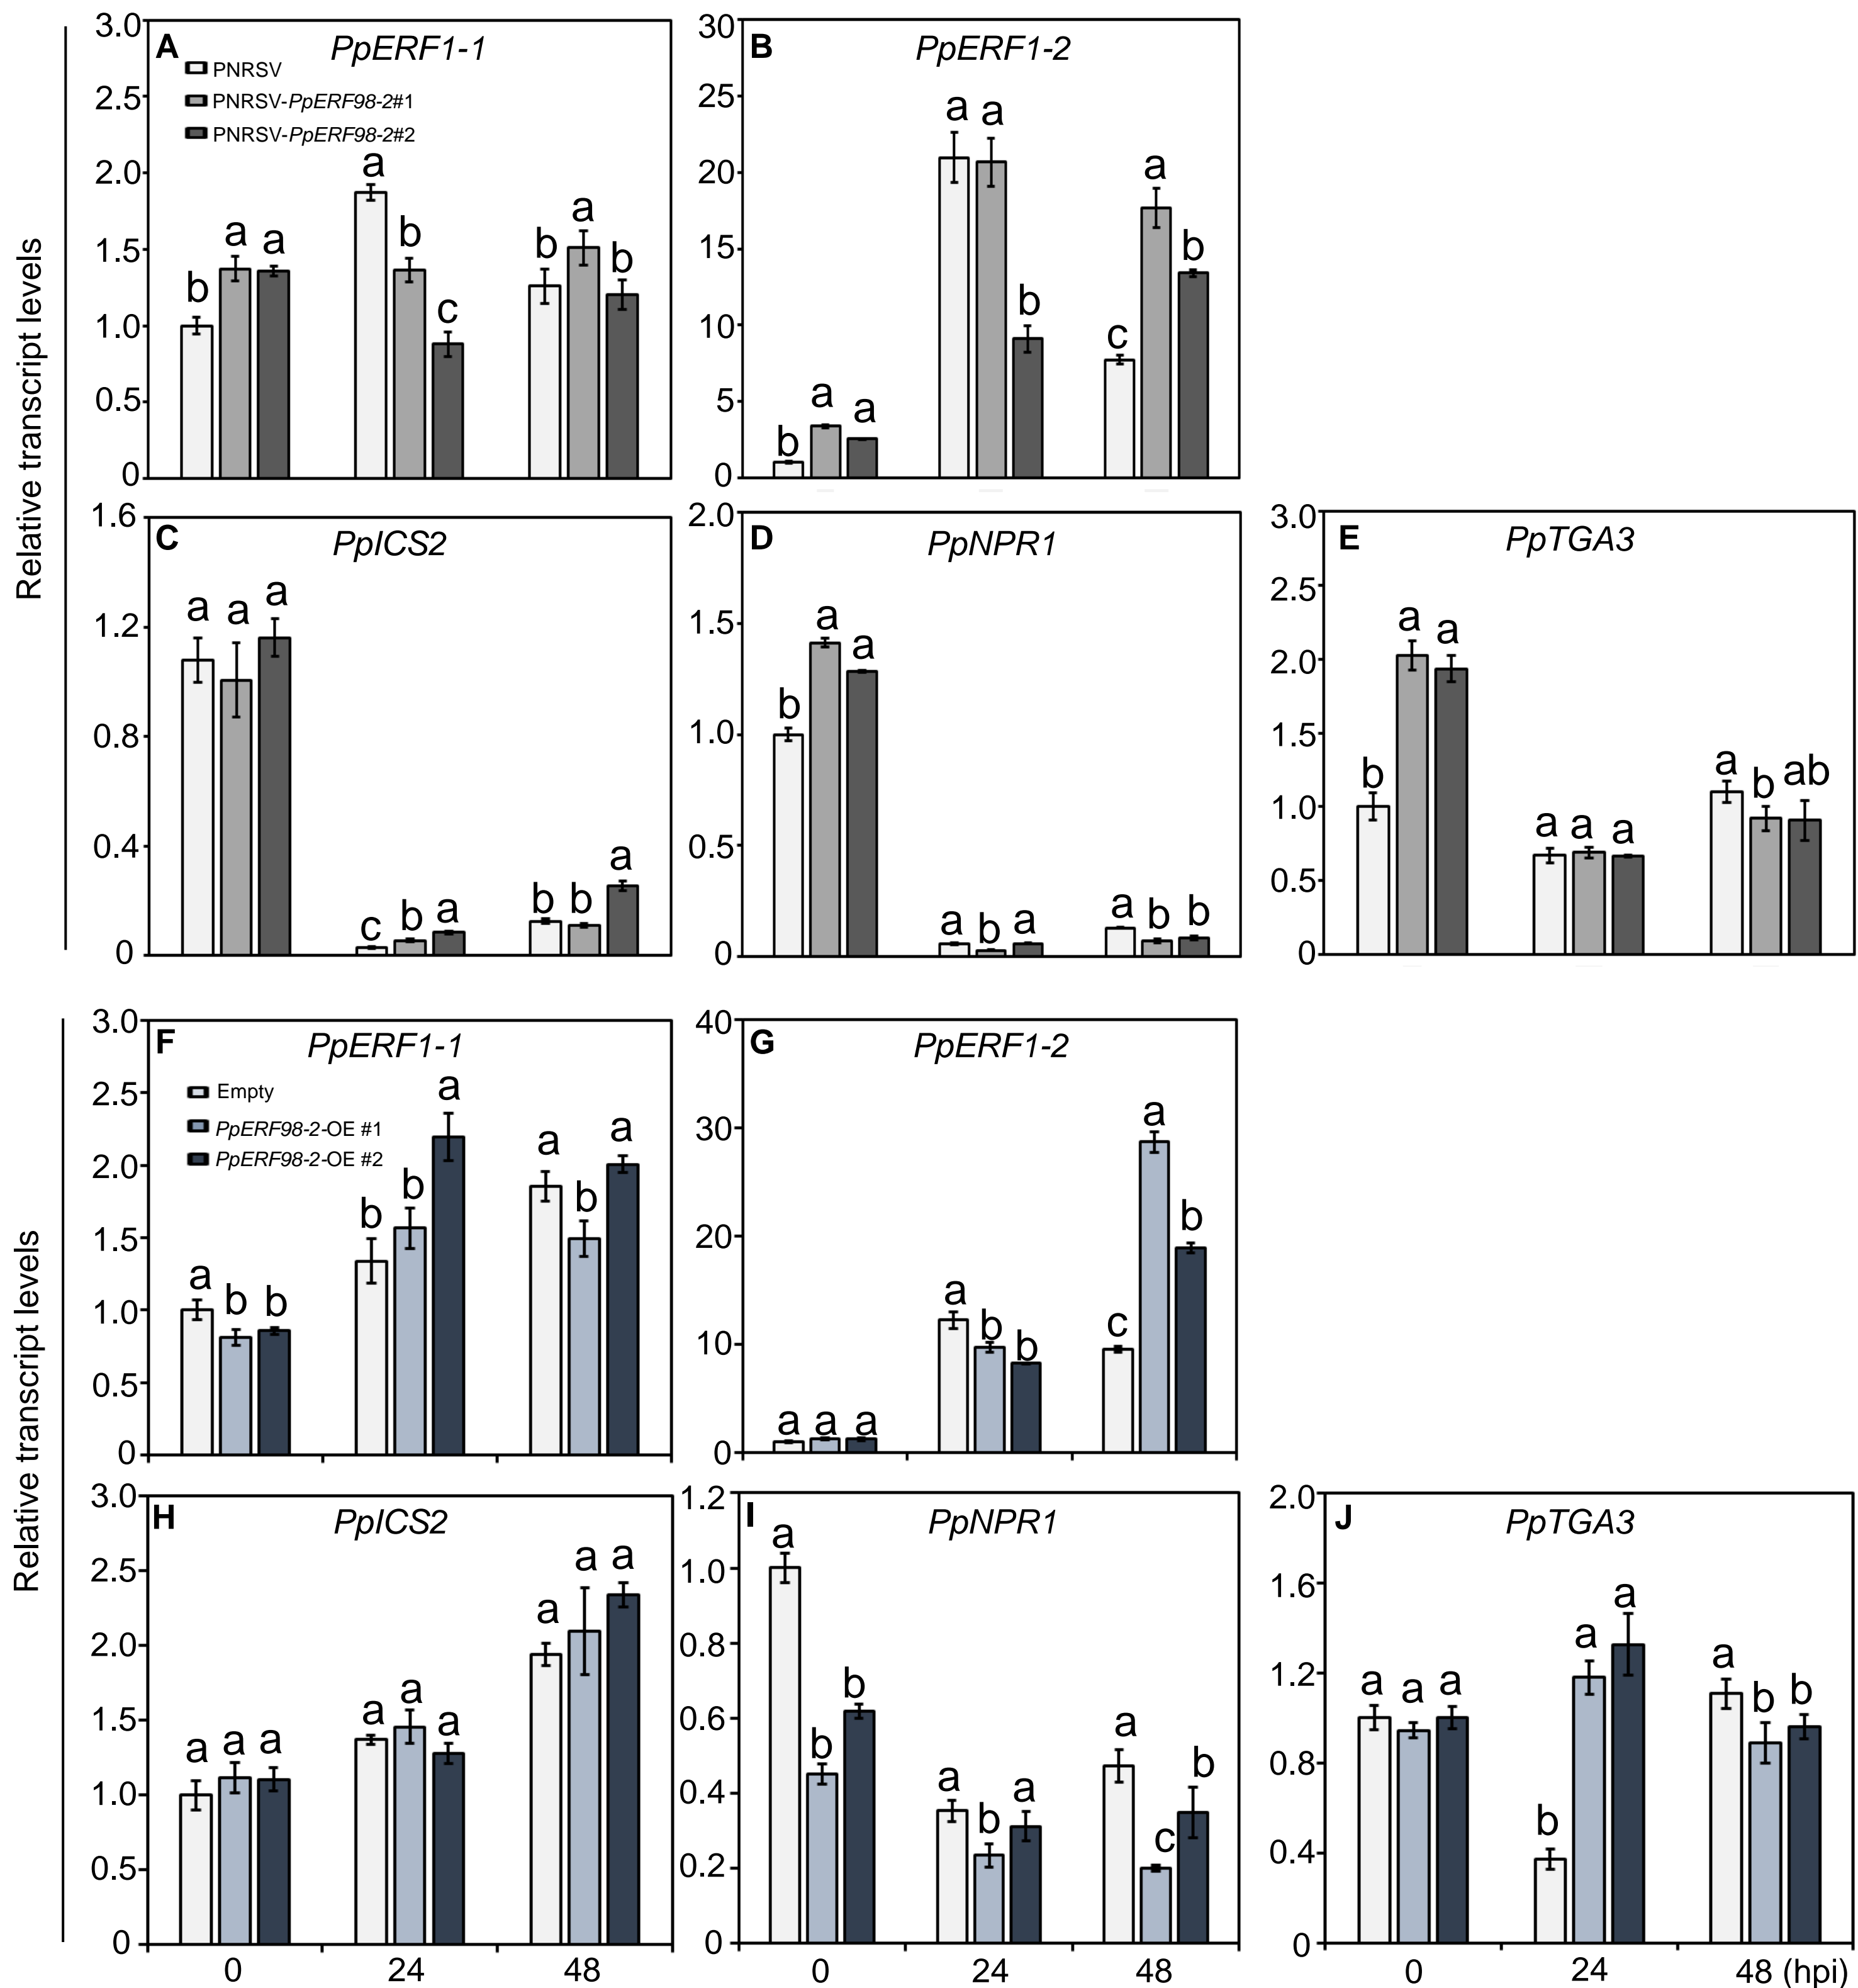

**Supplemental Figure S12. Transcriptional response of *PpERF1-1*, *PpERF1-2* and SA-related genes to *L. theobromae* invasion in peach leaves transiently modified in *PpERF98-2* expression.** Time-course transcripts of *PpERF1-1*, *PpERF1-2*, *PpICS2*, *PpNPR1* and *PpTGA3* after *L. theobromae* inoculation in peach seedlings silenced for *PpERF98-2* (A-E) or overexpressing it (F-J). *PpERF98-2* was silenced by PNRSV-mediated VIGS or overexpressed under the CaMV-35S promoter, while the controls were mock-transformed with empty vectors. Gene transcripts were normalized on the reference gene *PpTEF2*, and are displayed as fold changes over the control samples at time 0 hpi (which are therefore set to 1). Data are means  $\pm$  SD of three biological and four analytical replicates. Different letters on top of bars indicate statistical significance between transgenic and corresponding control plants at the same timepoint and  $P < 0.05$  based on Duncan's post hoc test.

**Table S1. *Cis*-acting regulatory elements present in the promoter regions of *PpERF98-1/2***

| <b>Gene</b>      | <b><i>Cis</i>-element</b> | <b>Sequence</b> | <b>Site</b>              | <b>Predicted function</b>              |
|------------------|---------------------------|-----------------|--------------------------|----------------------------------------|
| <i>PpERF98-1</i> | DRE                       | CCGAC           | -940                     | Ethylene response factor binding site  |
|                  | ERE                       | ATTTTAAA        | --                       | Ethylene-responsive element            |
|                  | GCC-box                   | GCCGCC          | --                       | Ethylene response factor binding site  |
|                  | ABRE                      | ACGTG           | -861                     | Abscisic acid-responsive element       |
|                  | CGTCA-motif               | CGTCA           | -203, -895               | Jamonic acid-responsive element        |
|                  | TGA-element               | AACGAC          | -810, -818               | Auxin-responsive element               |
|                  | W-box                     | TTGACC          | -256, -1795              | WRKY transcription factor binding site |
| <i>PpERF98-2</i> | DRE                       | CCGAC           | --                       | Ethylene response factor binding site  |
|                  | ERE                       | ATTTTAAA        | -69, -1182, -1890, -1896 | Ethylene-responsive element            |
|                  | GCC-box                   | GCCGCC          | -628                     | Ethylene response factor binding site  |
|                  | ABRE                      | ACGTG           | -189, -1993              | Abscisic acid-responsive element       |
|                  | CGTCA-motif               | CGTCA           | --                       | Jamonic acid-responsive element        |
|                  | TGA-element               | AACGAC          | -36, -1056,              | Auxin-responsive element               |
|                  | W-box                     | TTGACC          | -195                     | WRKY transcription factor binding site |

Note: Numbers indicate the positions of the nucleotides at the 5'-3' end of each fragment relative to the translation start-site in reporters.

**Table S2. Primer sequences used in this study**

| Purpose                                                     | Gene name                    | Gene ID        | Primer-Forward (5'—3')                             | Primer-Reverse (5'—3')                             |
|-------------------------------------------------------------|------------------------------|----------------|----------------------------------------------------|----------------------------------------------------|
| Gene cloning                                                | PpERF98-1 CDS                | Prupe.8G224700 | ATGCACTATATATCTTGCATGTCACAAG                       | CTAATGGGTTGGTTTCCCCTGTCTA                          |
|                                                             | PpERF98-2 CDS                | Prupe.1G037800 | ATGGAAGACCCTCGTAGAGGAAAGG                          | TCACTTCCGTTTGTTTTTCTCCTCT                          |
|                                                             | PpERF1-1 CDS                 | Prupe.6G348700 | ATGGATTCTTCATTCTTCCAAAACC                          | CTAGGTCATCGCAGATATGCGGAGA                          |
|                                                             | PpERF1-2 CDS                 | Prupe.8G224600 | ATGGAGATGGAATCTGCTAATTTCT                          | CTAATAGCTTTGTTCAAAAGTTCC                           |
|                                                             | PpPDS CDS                    | Prupe.1G174100 | ATGTCTCAGTGGGCTTGTGTCTC                            | TCACCGAAGGCTTGCCTCA                                |
| Vector construction for dual-luciferase assay               | pGreenII 62-SK-PpERF98-1     |                | cgctctagaactagtgatccATGCACTATATATCTTGCATGTCACAAG   | atcgaattcctgcagcccgggCTAATGGGTTGGTTTCCCCTGTCTA     |
|                                                             | pGreenII 62-SK-PpERF98-2     |                | cgctctagaactagtgatccATGGAAGACCCTCGTAGAGGAAAGG      | atcgaattcctgcagcccggg TCACTTCCGTTTGTTTTTCTCCTCT    |
|                                                             | pGreenII 0800-proPpMYC2      |                | ctatagggcgaattgggtaccCTGTCTAACGTTTTAGGTGAC         | cgctctagaactagtgatccCATCCAAAATACAAATCATTATCAC      |
|                                                             | pGreenII 0800-proPpERF1-1 F1 |                | ctatagggcgaattgggtaccTGATATAGATGGGACTTTTATTTGGTC   | cgctctagaactagtgatccTCGTGCGAACGTCATGTATTTC         |
|                                                             | pGreenII 0800-proPpERF1-1 F2 |                | ctatagggcgaattgggtaccTAATAACCTCCGTACGTCCTGATAAG    | cgctctagaactagtgatccACCCTTTCAGAGGCTGTCTATT         |
|                                                             | pGreenII 0800-proPpERF1-1 F3 |                | ctatagggcgaattgggtaccATGTAGCATGCACGAACCTTIGACT     | cgctctagaactagtgatccCAACTGATATTGCAGCATGTGTTTA      |
|                                                             | pGreenII 0800-proPpERF1-1 F4 |                | ctatagggcgaattgggtaccGCTACTAGCTATGCGATGACGTTG      | cgctctagaactagtgatccTATGGCTGAGCCTCCTTCTCC          |
|                                                             | pGreenII 0800-proPpERF1-1 F5 |                | ctatagggcgaattgggtaccGCCATGAAAACCCTCAACTCAA        | cgctctagaactagtgatccAGTTTGAATAATTTGGAAATGGAATTT    |
|                                                             | pGreenII 0800-proPpERF1-2 F1 |                | ctatagggcgaattgggtaccTACATCAATGTTTCATCTTTAAGG      | cgctctagaactagtgatccGGCGTTAGTTGGATTGTCTCAAG        |
|                                                             | pGreenII 0800-proPpERF1-2 F2 |                | ctatagggcgaattgggtaccTCGTTGTTAGGTTTGTCTGATAGGC     | cgctctagaactagtgatccGTTGCCGTGGCATCATGG             |
|                                                             | pGreenII 0800-proPpERF1-2 F3 |                | ctatagggcgaattgggtaccTGTAATATGTAATTTTGGTCAAATCCC   | cgctctagaactagtgatccGCAGCTGAAAGCTACGATTTGTG        |
|                                                             | pGreenII0800-proPpPR4        |                | <b>GGGGTACC</b> GGATCTTGGGGAAGGGAGGAGCTGT          | <b>CCGCTCGAG</b> TCGATGTTTGTATGTACATTGTTTTG        |
|                                                             | pGreenII 0800-proPpCHI       |                | <b>GGGGTACC</b> TGCCGGCTGCAATCGGTCAGAGGAC          | <b>CCGCTCGAG</b> GTCTGTTTGGGGTCTTGTTTTGGT          |
|                                                             | pGreenII 0800-proPpPR3       |                | <b>GGGGTACC</b> AATCAAATCAAAATTTAAAGCTT            | <b>CCGCTCGAG</b> TTTTCTGTAGGGATATGTATGGGTA         |
|                                                             | pGreenII 0800-proPpMYC2      |                | <b>GGGGTACC</b> CTGTCTAACGTTTTAGGTGAC              | <b>CCGCTCGAG</b> CATCCAAAATACAAATCATTATCAC         |
| Vector construction for yeast one-hybrid (Y1H) assay        | pGADT7-PpERF98-1             |                | ggccagtgaattccaccgggATGCACTATATATCTTGCATGTCACAAG   | cagctcgagctcgatggatccCTAATGGGTTGGTTTCCCCTGTCTA     |
|                                                             | pGADT7-PpERF98-2             |                | ggccagtgaattccaccgggATGGAAGACCCTCGTAGAGGAAAGG      | cagctcgagctcgatggatccTCACTTCCGTTTGTTTTTCTCCTCT     |
|                                                             | pAbAi-proPpERF1-1 F1         |                | cttgaattcgagctcggtaccAAAAGGAACATCTAAAAAATTGAATT    | atacagagcacatgcctcgagGAAAGAAAGAGGGTTGAATTTGAAA     |
|                                                             | pAbAi-proPpERF1-1 F2         |                | cttgaattcgagctcggtaccGCATACACATTGACTGTTAAACAAAATAT | atacagagcacatgcctcgagCAACTGATATTGCAGCATGTGTTTA     |
|                                                             | pAbAi-proPpERF1-2            |                | cttgaattcgagctcggtaccAACTGTTTATTCAATTCGTTATGCCA    | atacagagcacatgcctcgagGTGCAGGTTAATTTGTTCTTTCTATATTG |
| Specific primers for quantitative reverse-transcriptase PCR | <i>PpERF1-1</i>              | Prupe.6G348700 | ACCACCATCACAGTCAACCC                               | CTGACACCGTTTCGAGTGGGA                              |
|                                                             | <i>PpERF1-2</i>              | Prupe.8G224600 | GGAGATGCTGCTCTATGATGC                              | TAGGACTTTTCCGTTGTGGGT                              |
|                                                             | <i>PpERF98-1</i>             | Prupe.8G224700 | TGATCAGCACTTCATCCTCTTCA                            | CTCCTCCAAAACCATGTTGTCC                             |
|                                                             | <i>PpERF98-2</i>             | Prupe.1G037800 | AAATGTGCCAAGCCACAGAC                               | GAAGGGAAGCGAAGAAGTGC                               |
|                                                             | <i>PpICS2</i>                | Prupe.5G187000 | TCCAAGTCCAGCAGTTTGTG                               | TCTCTCCTCCTCCAAACCAA                               |
|                                                             | <i>PpNPR1</i>                | Prupe.4G107800 | TGCTGCCTTATGGCGATGTT                               | TTAAGAAGGCGTCGCTGGAA                               |
|                                                             | <i>PpTGA3</i>                | Prupe.1G508100 | CTCTCACGCAGGAATGGAG                                | CGCAGCCGGTGAAAGTATTC                               |
|                                                             | <i>PpMYC2</i>                | Prupe.5G035400 | GCTCGACGGAGCTCATCTAC                               | ATGTTACCGGGTCTTGAC                                 |
|                                                             | <i>PpPR1</i>                 | Prupe.8G153800 | TGACAAGGTGTGTGGGCATT                               | CGGATCATAGTTGCACCCGA                               |

|                                                                               |                     |                               |                                                   |                                                   |
|-------------------------------------------------------------------------------|---------------------|-------------------------------|---------------------------------------------------|---------------------------------------------------|
|                                                                               | <i>PpPR2</i>        | Prupe.1G122900                | AAGTTTGAGGCAGCCAGTGA                              | GGGTTCTCCAAGAGGTAGGC                              |
|                                                                               | <i>PpPR3</i>        | Prupe.1G205600                | ACGGCTTAAACTCGCCAGAA                              | TGATGCGGGCTTGAAGTAGG                              |
|                                                                               | <i>PpCHI</i>        | Prupe.2G305200                | CGGTGCAGGAAGCTACTCTC                              | CCATCCAAAAGTGCATCACC                              |
|                                                                               | <i>PpPR4</i>        | Prupe.6G141100                | GGTGACAAACACGGGCACAGGAG                           | AAGAAGCGATCCCACCTTGAAGT                           |
|                                                                               | <i>PpTEF2</i>       | Prupe.4G138700                | AGCAAGTCACCCAACAAGCATA                            | CCAACCAAAGTCTTCAGCCAAT                            |
|                                                                               | <i>LITUBULIN</i>    | HQ660474                      | AATCGGTGCTGCTTTCTGG                               | TTGTTGGACGCCTCGTTG                                |
|                                                                               | <i>SIPR1a</i>       | NM_001247199.2                | GATGTGGGACGATGAGAAGCAATG                          | GTTGCATCGAACCCTAGCACAACCT                         |
|                                                                               | <i>SIPR2</i>        | XM_015209904.2                | CAGATTTCACTTCCGTATGCTCTT                          | CCATCCACTCTCTGACACAACAAT                          |
|                                                                               | <i>SIPRNP24</i>     | XM_015227829.1                | GAGGGGAAGTAAGATGGCACGTAT                          | CTCCACCACAATCACCAGTCTGAC                          |
|                                                                               | <i>SIPR5</i>        | NM_001330783.1                | AACTGCCCCACACCGTTTG                               | GCCCCAAAACCACCAACTCTG                             |
|                                                                               | <i>SICHI</i>        | NM_001247475.2                | TTTTTCGGTCAAACATCTCACG                            | ATTATCCTGTTCTGTCATCC                              |
|                                                                               | <i>SIPR3</i>        | LOC101251136                  | TGCCCAAACCTCCCATGAAA                              | AAAAGGTCCACTCCGATGGC                              |
|                                                                               | <i>SIPR4</i>        | LOC101243897                  | TGGTCCTGCTGGAAAAGACAT                             | TAGCTCGAATCGTTGCCCC                               |
|                                                                               | <i>SIActin</i>      | NM_001330119.1                | ATGGCAGACGGAGAGGATATTCA                           | GCCTTTGCAATCCACATCTGCTG                           |
| Vector construction for luciferase complementation imaging                    | 771- PpERF98-1-nLUC |                               | acgggggacgagctcggtacc ATGCACTATATATCTTGCATGTCACAA | cgcgtacgagatctggtcgacATGGGTTGGTTTCCCCTG           |
|                                                                               | 772-cLUC-PpERF98-1  |                               | tacgcgtccccgggcggtacc ATGCACTATATATCTTGCATGTCACAA | cgcgtacgagatctggtcgac CTAATGGGTTGGTTTCCCCTG       |
|                                                                               | 771-PpERF98-2-nLUC  |                               | acgggggacgagctcggtacc ATGGAAGACCCTCGTAGAGGAAA     | cgcgtacgagatctggtcgac CTTCCGTTTGTITTTCTCTCT       |
|                                                                               | 772-cLUC-PpERF98-2  |                               | tacgcgtccccgggcggtacc ATGGAAGACCCTCGTAGAGGAAA     | cgcgtacgagatctggtcgac TCACTTCCGTTTGTITTTCTCTCT    |
|                                                                               | 771-PpERF1-1 -nLUC  |                               | acgggggacgagctcggtacc ATGGATTCTTCATTCTTCCAAAACC   | cgcgtacgagatctggtcgac GGTTCATCGCAGATATGCGGA       |
|                                                                               | 771-cLUC-PpERF1-2   |                               | tacgcgtccccgggcggtacc ATGGATTCTTCATTCTTCCAAAACC   | cgcgtacgagatctggtcgac CCTAGGTCATCGCAGATATGCGG     |
|                                                                               | 771-ERF1-2-nLUC     |                               | acgggggacgagctcggtacc ATGGAGATGGAATCTGCTAATTCT    | cgcgtacgagatctggtcgac ATAGCTTTGTTCCAAAAGTTCCTC    |
|                                                                               | 772- cLUC-ERF1-2    |                               | tacgcgtccccgggcggtacc ATGGAGATGGAATCTGCTAATTCT    | cgcgtacgagatctggtcgac CTAATAGCTTTGTTCCAAAAGTTCCTC |
| Vector construction for overexpression and luciferase complementation imaging | attB1-PpERF98-1     |                               | aaaaagcaggctcc ATGCACTATATATCTTGCATGTCACAAG       | agaaagctgggtt CTAATGGGTTGGTTTCCCCTGTCTA           |
|                                                                               | attB1-PpERF98-2     |                               | aaaaagcaggctcc ATGGAAGACCCTCGTAGAGGAAAAGG         | agaaagctgggtt TCACTTCCGTTTGTITTTCTCTCT            |
|                                                                               | attB1-PpERF1-1      |                               | aaaaagcaggctcc ATGGATTCTTCATTCTTCCAAAACC          | agaaagctgggtt CTAGGTCATCGCAGATATGCGGAGA           |
|                                                                               | attB1-PpERF1-2      |                               | aaaaagcaggctcc ATGGAGATGGAATCTGCTAATTCT           | agaaagctgggtt CTAATAGCTTTGTTCCAAAAGTTC            |
|                                                                               | Adapter attB1       |                               | GGGGACAAGTTTGTACAAAAAAGCAGGCT                     |                                                   |
| Adapter attB2                                                                 |                     | GGGGACCACTTTGTACAAGAAAGCTGGGT |                                                   |                                                   |
| Vector construction for virus-induced gene silencing                          | PNRSV-PpERF98-1     |                               | <b>GCTCTAGA</b> ATGTCACAAGCACAACCCATATT           | <b>GCTCTAGA</b> ACCTTAGTCTGCTCCTTCTGC             |
|                                                                               | PNRSV-PpERF98-2     |                               | <b>GCTCTAGA</b> ATGGAAGACCCTCGTAGAGG              | <b>GCTCTAGA</b> CCCATGGCCTCCTTCGGA                |
|                                                                               | PNRSV-PpPDS         |                               | <b>GCTCTAGA</b> AGAAAGCTGAAGAACACAT               | <b>GCTCTAGA</b> GATTGTAATATTCCTTACAT              |

Note: Letters in lowercase and pink font indicate adapter sequence and restriction endonuclease recognition sequence.
